# Supplementary material for: A search for small noncoding RNAs in Staphylococcus aureus reveals a conserved sequence motif for regulation
Source: PubMed Central journal article supplement — Nucleic Acids Res. 2009 Sep 28;37(21):7239–57. doi: 10.1093/nar/gkp668 (PMC2790875; doi:10.1093/nar/gkp668), 2009-09-28
Supplement: gkp668_1.pdf [file gkp668_1.pdf]

## SUPPLEMENTARY MATERIAL

### **A search for small noncoding RNAs in *Staphylococcus aureus* reveals a conserved sequence motif for regulation.**

Thomas Geissmann<sup>1</sup>, Clément Chevalier<sup>1</sup>, Marie-Josée Cros<sup>2</sup>, Sandrine Boisset<sup>3</sup>, Pierre Fechter<sup>1</sup>, Cécile Noirot<sup>2</sup>, Jacques Schrenzel<sup>4</sup>, Patrice François<sup>4</sup>, François Vandenesch<sup>3</sup>, Christine Gaspin<sup>2</sup> and Pascale Romby<sup>1</sup>

<sup>1</sup>Architecture et Réactivité de l'ARN, Université de Strasbourg, CNRS, IBMC, 15 rue René Descartes, F-67084 Strasbourg, France.

<sup>2</sup>INRA, UR 875, F-31320 Castanet-Tolosan, France

<sup>3</sup>INSERM U851, Centre National de Référence des Staphylocoques, F-69008 Lyon, France; Université de Lyon I, F-69008 Lyon, France.

<sup>4</sup>Genomic Research Laboratory, Service of Infectious Diseases, University of Geneva Hospitals, Rue Micheli-du-Crest, 24, CH-1211 Geneva 14, Switzerland

#### **Content:**

Materials and Methods

References

Figure S1

Figure S2

Figure S3

Figure S4

Figure S5

Figure S6

Figure S7

Table S1

Table S2

Table S3

Table S4

## **MATERIALS AND METHODS**

### **Cell culture**

One colony of *S. aureus* (RN6390, COL) was grown overnight at 37°C in 2 to 3 ml of medium, either in brain-heart infusion (BHI), or in NZM medium (10 g/l Casein Tryptone digested; 5 g/l NaCl; 2 g/l MgSO<sub>4</sub>·7H<sub>2</sub>O; pH 7.0). From this pre-culture, 200 µl was placed in 10 to 20 ml of medium (BHI or NZM) and incubated at 37°C for 2 h (OD 600 nm 0.5 in BHI, and 0.2 in NZM, exponential phase) and for 6 h (OD 600 nm 5 in BHI, and 2.5 in NZM, late-exponential phase).

### **Preparation of the genomic DNA**

DNA was prepared from 2 ml of RN6390 or COL strains grown in BHI medium for 4 h at 37°C. The cells were centrifuged (3273 g, 4°C, 10 min) and the pellet was dissolved gently in 200 µl of lysis buffer (20 mM Tris-HCl pH 8; 2 mM EDTA; 1.2% Triton X-100). Cell lysis was performed in the presence of 2 µl of lysostaphin 2.5 mg/ml at 37°C for 30 min. The genomic DNA was purified using the DNeasy Tissue kit following the protocol of the company. The genomic DNA was kept at -20°C in a commercial buffer.

### **Preparation of total RNAs and 3' end-labeling**

Total RNAs were prepared from 20 ml of *S. aureus* grown in BHI or NZM medium as described above. After centrifugation of the cells (3273 g, 4°C, 10 min), total RNAs were extracted using the fastRNA Pro Blue kit (Qbiogen, France), and kept at -20°C at a concentration of 1 µg/µl in sterile water. The RNAs (20 µg) were purified by electrophoresis on a 6% polyacrylamide- 8 M urea gel to remove the highly abundant ribosomal RNAs. Bands corresponding to 50-600 nt long RNAs were cut into pieces and the RNAs were eluted at 4°C overnight in 1.5 ml of elution buffer (0.5 M ammonium acetate; 1 mM EDTA; 0.1% SDS). The RNAs were precipitated with 2.5 vol of ethanol and washed in 80% ethanol. The purified RNAs were kept in sterile water at -20°C at a concentration of 5 µg/µl.

The RNAs were labeled at their 3' end using T4 RNA ligase and [ $\alpha$ -<sup>32</sup>P]pCp. The reaction was done at 4°C overnight in 20 µl containing 10 µg total RNAs, 2 µl of commercial buffer 10x, 5 U of T4 RNA ligase (Ambion) and 5 µl [ $\alpha$ -<sup>32</sup>P]pCp (3000 Ci/mmol, 10 mCi/ml, Amersham). Labeled RNAs were purified on a gel filtration column (Micro-Bio Spin P-6, Bio-Rad) to remove the excess of pCp. The quality of the RNAs was controlled by electrophoresis on a 8% polyacrylamide- 8 M urea gel. Labeled RNAs were kept at -20°C.

### **Home-made macroarrays**

Macroarrays were done with dsDNAs corresponding to the 36 selected IGRs. The IGRs were PCR amplified from *S. aureus* RN6390 genomic DNA using a set of oligonucleotides (Table S4). The PCR reaction was carried out in a total volume of 50  $\mu$ l containing 5  $\mu$ l of commercial buffer 10x, 100  $\mu$ M dNTP mix, 20 ng genomic DNA, 1 U of Taq DNA polymerase, and 50 pmol of each oligonucleotide. The hybridization temperature varies from 45 to 55°C depending on the stability of the duplexes. After 35 cycles of 30 sec denaturation at 94°C, 30 sec hybridization at 45-55°C, and 1 min elongation at 72°C, the quality of the amplified dsDNA fragments was determined by electrophoresis on a 1% agarose gel. Then, 5  $\mu$ l of a PCR reaction were mixed in 5  $\mu$ l of a solution containing 95 % formamide, 18 mM EDTA, and 0.025% SDS, and the dsDNA was denatured 3 min at 90°C followed by cooling on ice. The denatured DNA (2  $\mu$ l) was then spotted in duplicate on a nitrocellulose membrane and dried. The membrane was incubated 1 h at 42°C in the hybridization buffer (50 mM sodium phosphate pH 7.2, 7 % SDS, 1 mM EDTA). The hybridization buffer was changed and the 3' end-labeled total RNAs, which were previously denatured, were added to the membrane. Hybridization was performed at 42°C overnight. The membrane was washed twice in buffer containing 40 mM sodium phosphate, 5 % SDS, and 1 mM EDTA for 15 min at 42°C. The radioactive spots were visualized by autoradiography of the hybridized membrane, which was previously exposed overnight.

## REFERENCES

1. Lu, Y., Turner, R.J. and Switzer, R.L. (1996) Function of RNA secondary structures in transcriptional attenuation of the *Bacillus subtilis* *pyr* operon. *Proc. Natl. Acad. Sci. USA*, **93**, 14462-14467.
2. Schuster, P., Fontana, W., Stadler, P.F. and Hofacker, I.L. (1994) From sequences to shapes and back: a case study in RNA secondary structures. *Proc Biol Sci*, **255**, 279-284.
3. Bischoff, M., Dunman, P., Kormanec, J., Macapagal, D., Murphy, E., Mounts, W., Berger-Bachi, B. and Projan, S. (2004) Microarray-based analysis of the *Staphylococcus aureus*  $\sigma^B$  regulon. *J. Bacteriol.*, **186**, 4085-4099.
4. Pané-Farré, J., Jonas, B., Forstner, K., Engelmann, S. and Hecker, M. (2006) The  $\sigma^B$  regulon in *Staphylococcus aureus* and its regulation. *Int. J. Med. Microbiol.*, **296**, 237-258.
5. Livny, J., Teonadi, H., Livny, M. and Waldor, M.K. (2008) High-throughput, kingdom-wide prediction and annotation of bacterial non-coding RNAs. *PLoS ONE*, **3**, e3197.
6. Pichon, C. and Felden, B. (2005) Small RNA genes expressed from *Staphylococcus aureus* genomic and pathogenicity islands with specific expression among pathogenic strains. *Proc. Natl. Acad. Sci. USA*, **102**, 14249-14254.
7. Roberts, C., Anderson, K.L., Murphy, E., Projan, S.J., Mounts, W., Hurlburt, B., Smeltzer, M., Overbeek, R., Disz, T. and Dunman, P.M. (2006) Characterizing the effect of the *Staphylococcus aureus* virulence factor regulator, SarA, on log-phase mRNA half-lives. *J. Bacteriol.*, **188**, 2593-2603.
8. Marchais, A., Naville, M., Bohn, C., Bouloc, P. and Gautheret, D. (2009) Single-pass classification of all non-coding sequences in a bacterial genome using phylogenetic profiles. *Genome Res.*, 10.1101/gr.089714.108.

**Figure S1.** Strategy used to identify the functional intergenic regions of the *Staphylococcus aureus* N315 genome. Our strategy integrates data generated from complementary approaches (A-C) and data obtained from different sources (D) with the goal to select the most promising candidates. (A) Description of the comparative analysis implemented in a pipeline called RNAsim. Only clusters containing at least one IGR of *S. aureus* N315 genome longer than 150 nt were kept for further analysis. (B) The biased composition analysis relies on three approaches (HMM, di-nucleotide and G+C frequencies). A simple Hidden Markov Model (HMM) was used as an automatic segmentation approach, and was computed by considering known ncRNAs and riboswitches available in RFAM and Genbank databases. Di-nucleotides, G+C frequencies (B) and free energy values (C) were computed on a 90 nt sliding window along the genome. (D) Other data (promoters, STAR, different hairpin motifs) were computed using PatScan. Rho-independent terminators were obtained using TransTermHP. MOSAIC database was used to identify conserved and strain-specific regions among available *S. aureus* genomes. Tandem repeats were extracted from the Tandem Repeat database. (D) The data and the quantitative variables (free energy, G+C content) were integrated into ApolloRNA to select the IGR for functional analysis. Two examples are illustrated: RsaG was selected based on the HMM segmentation, the presence of a promoter and a Rho-independent terminator, and the orientation of the flanking genes; RsaE and RsaF were selected based on RNAsim, the presence of promoters and Rho-independent terminators, and the orientation of the flanking genes. (a-e) web sites from which softwares and/or data were obtained : (a) PatScan (<http://www-new.mcs.anl.gov/compbio/PatScan/HTML/scanner.html>), (b) TransTermHP (<http://transterm.cbcb.umd.edu/index.php>), (c) MOSAIC (<http://genome.jouy.inra.fr/mosaic>), (d) the tandem Repeat Database (<http://minisatellites.u-psud.fr>), (e) ApolloRNA (<http://carlit.toulouse.inra.fr/ApolloRNA/index.html>).

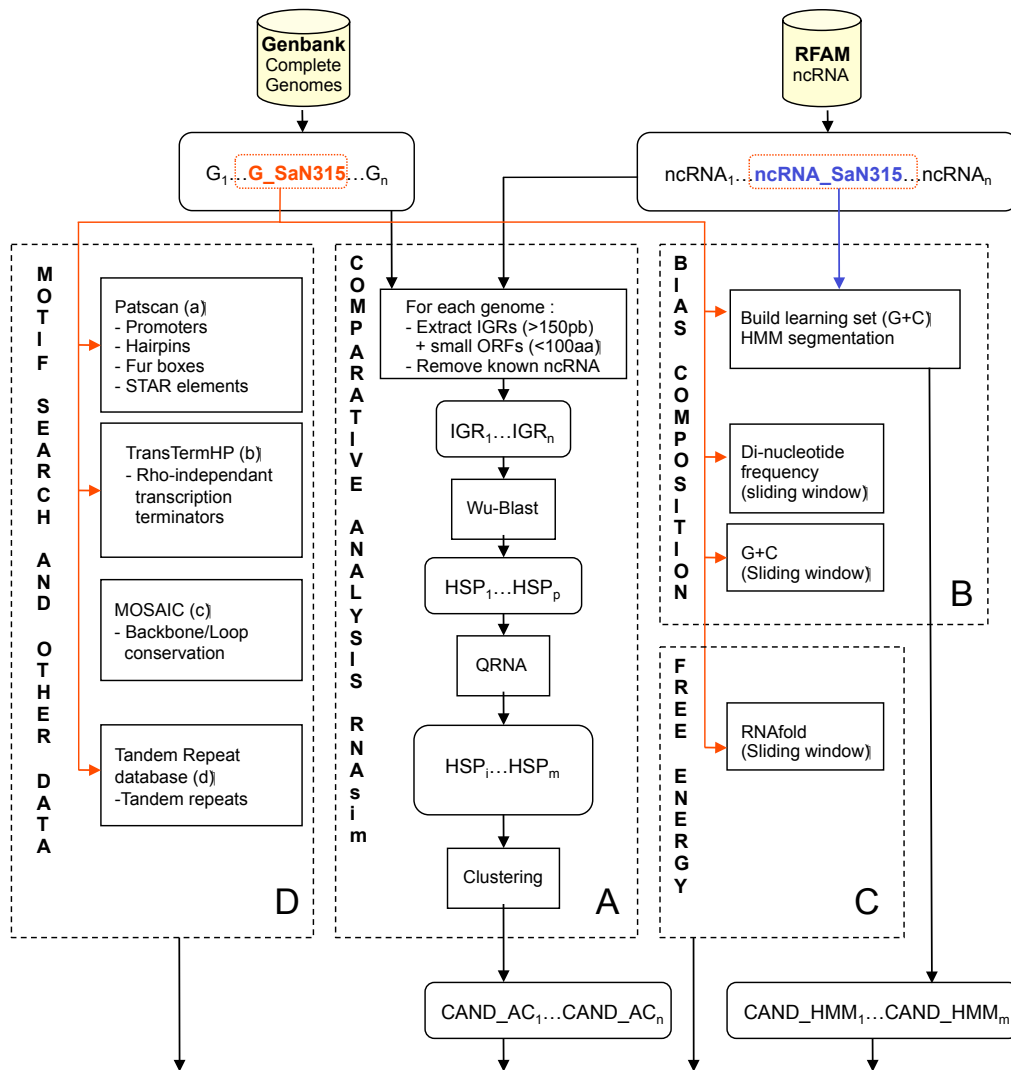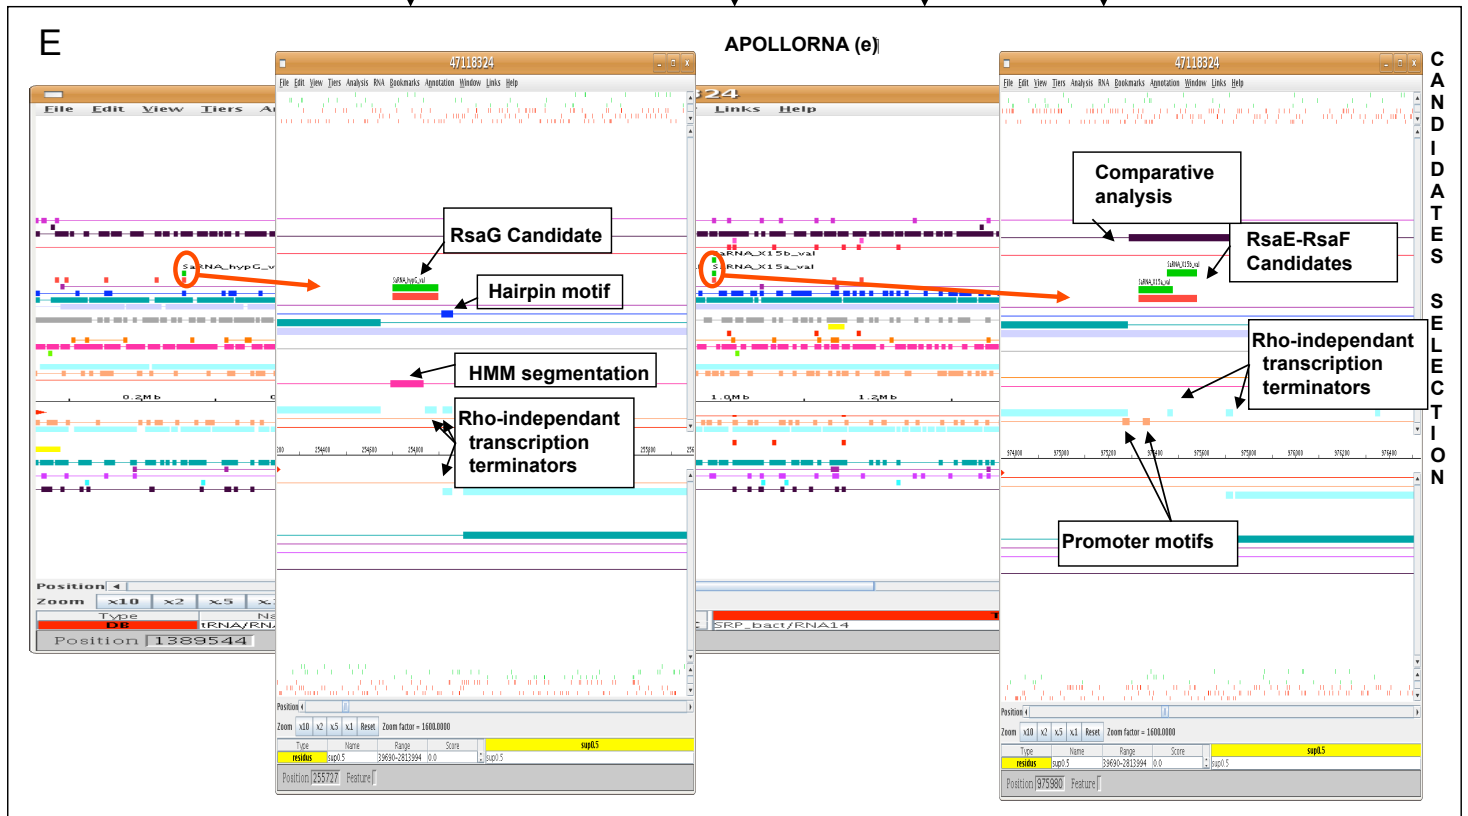

**Figure S2.** Strategy implemented in RNAsim. (A) Wu-blast comparisons are realized between intergenic regions of genomes A, B and C (including *S. aureus* strains, Staphylococci or firmicutes). (B) QRNA is used to filter pairwise alignments in order to retain only putative structured RNAs. In this example, the alignment between A4 and C2 is removed from the set of pairwise alignments. (C) Pairwise alignments are clustered when at least one sequence in an alignment overlaps one of the two sequences in another alignment. In this example, A2 aligns with B1 and B1 aligns with C3. A2, B1 and C3 are thus clustered as well as A3, B2 and C1.

Wu-blast comparisons between A, B and C

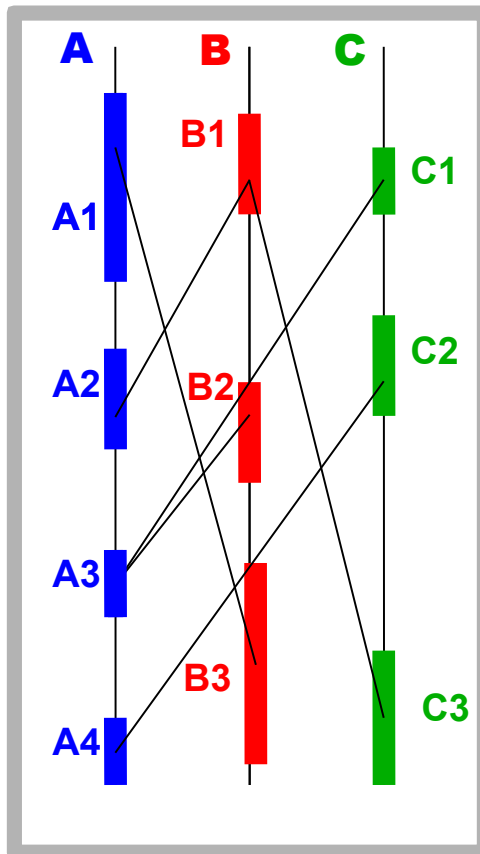

QRNA filtering : retain structured putative RNA

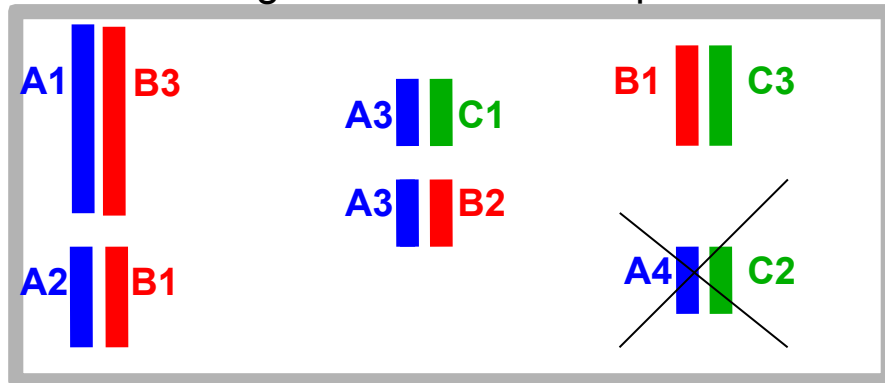

Clustering of sequences covering same loci

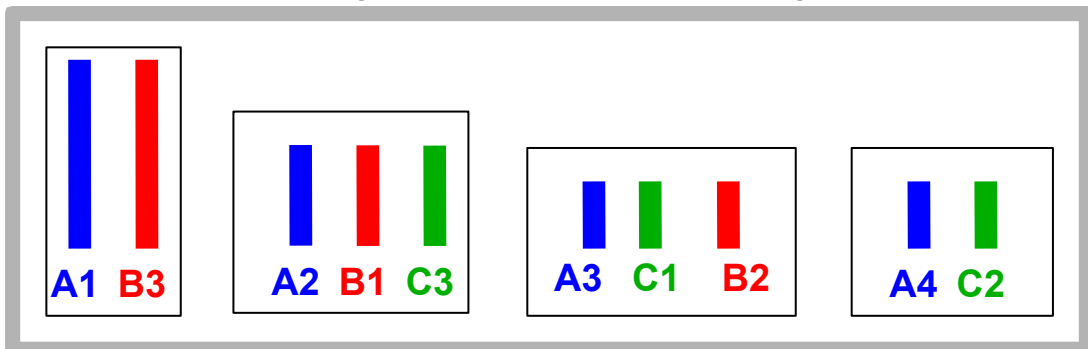

Figure S2- Geissmann et al.



**Figure S3.** Analysis of Rsa RNA expression. (B) Northern blot analysis of RsaA, RsaC, RsaE, RsaF, and RsaH in various *S. aureus* strains (RN6390, COL, and Newman), LUG774 (RN6390- $\Delta rnc$ ), and LUG911 (RN6390- $\Delta hfq$ ) grown in BHI (rich medium) or NZM (stringent medium) at the exponential (E) and stationary (S) phases of growth. COL strain was grown under various stress conditions: osmotic stress (NaCl), oxidative stress (H<sub>2</sub>O<sub>2</sub>, paraquat), iron chelating agent (dipyridyl), acidic pH, cold shock (25°C), and heat shock (42°C). (B) Determination of the half-lives of RsaA, RsaD, RsaE, RsaG, and RsaI. The cells were treated with rifampicin and total RNAs were extracted after 1, 2, 5, 10, 20, 30, and 60 min at 37°C in BHI medium. 5S rRNA was probed to quantify the yield of RNA in each lane. (C) Northern blot analysis of RsaF in *S. aureus* strains: RN6390, RN6911 ( $\Delta agr$ ), LUG1160 (RN6390- $\Delta rot$ , *rot* encodes the repressor of toxins), LUG911 (RN6390- $\Delta hfq$ ), SH1000, COL, and Newman. Total RNAs were prepared from cells grown in BHI medium at the exponential (E) and stationary (S) phases of growth.

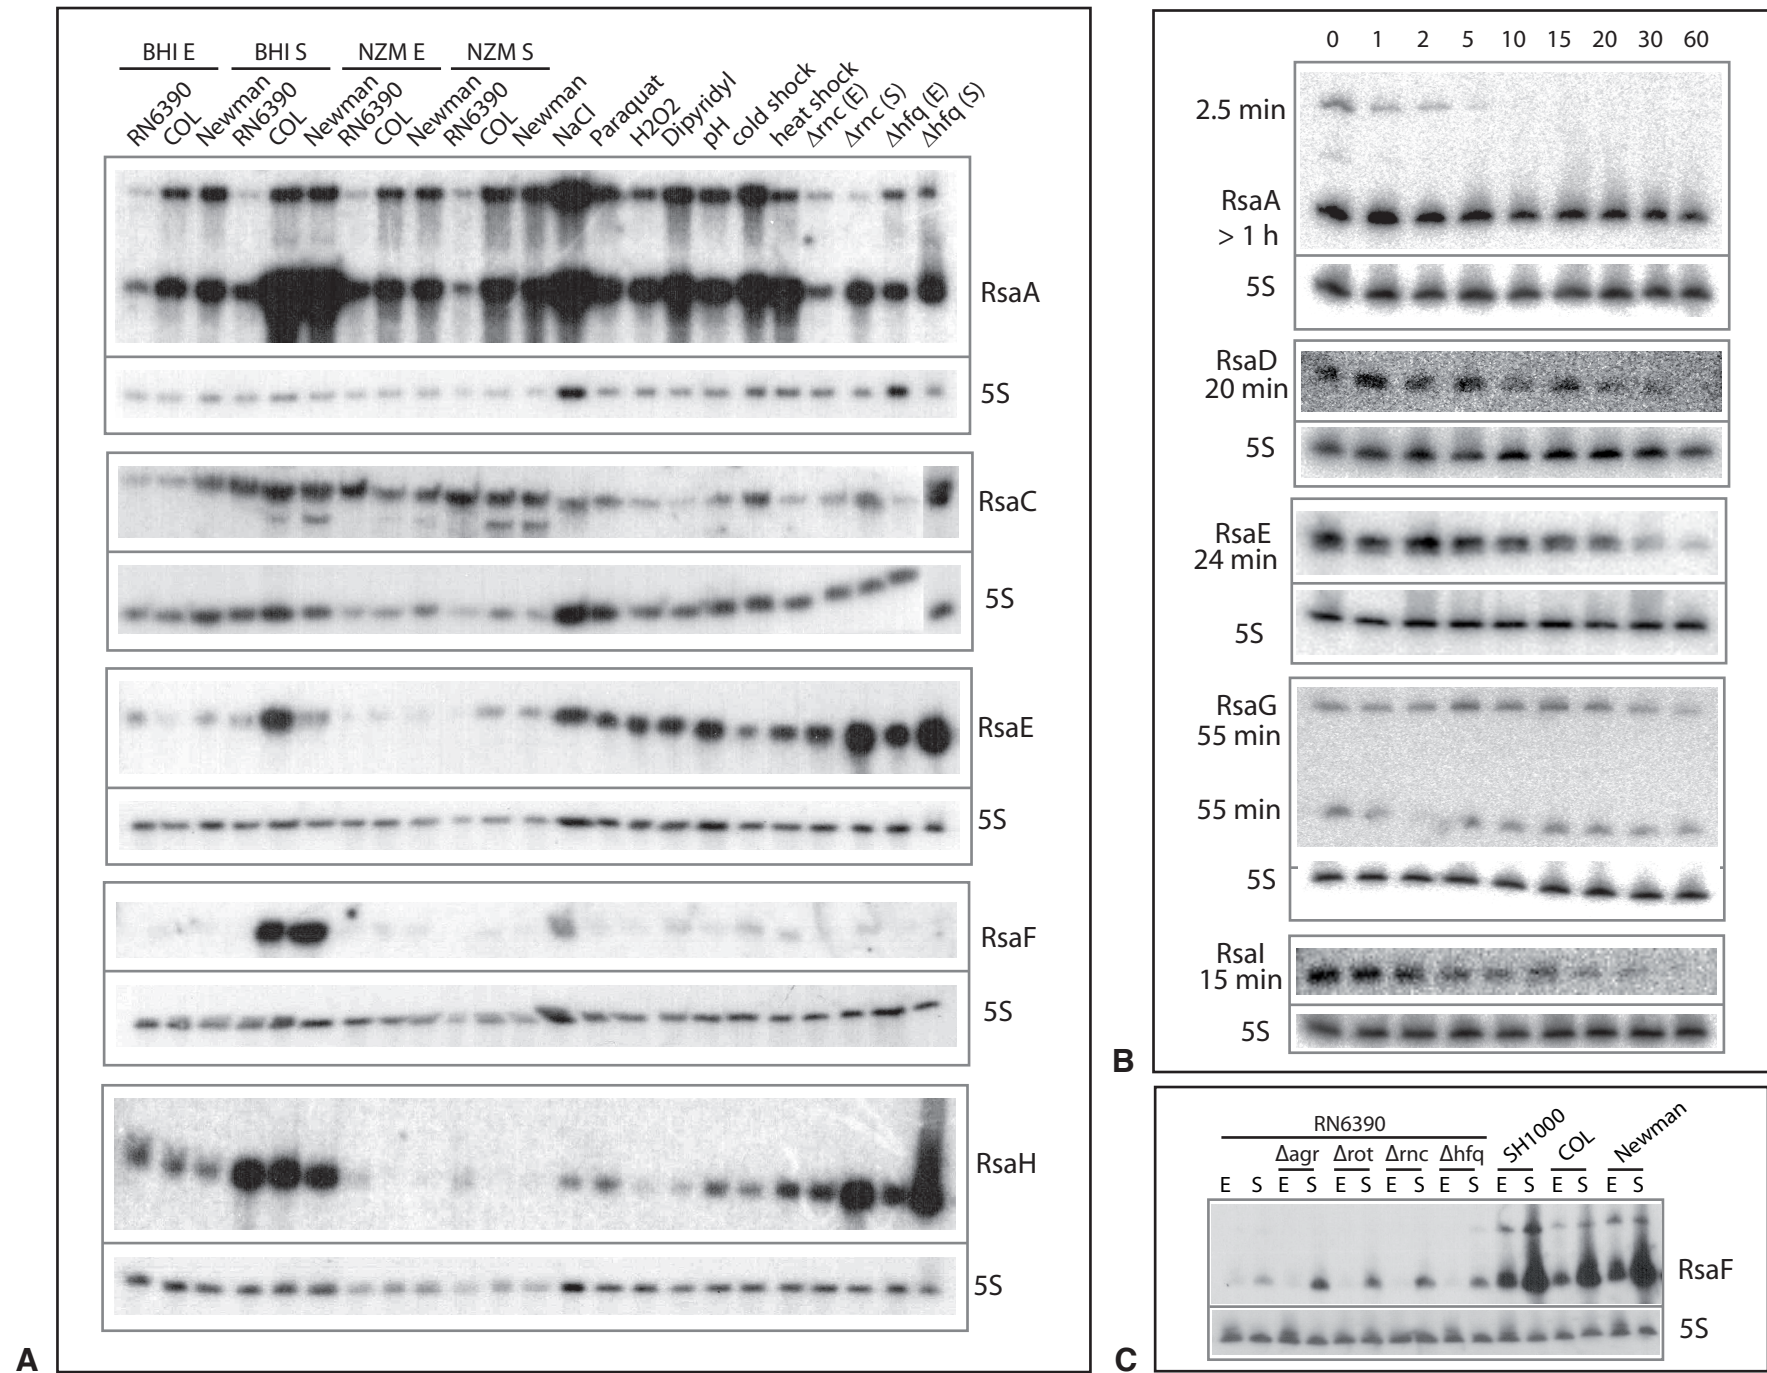

Figure S3-Geissmann et al.

**Figure S4.** Examples of conserved *cis*-regulatory leader regions of mRNAs in *S. aureus*. (A) Northern blot analysis of RsaK in *S. aureus* strains (RN6390, COL, and Newman). Total RNAs were prepared from cells grown in BHI at the exponential (2 h) or stationary (6 h) phases of growth. Lane L: RNA ladder (Ambion). (B) Sequence of *S. aureus* RsaK corresponding to the leader region of *glcA* mRNA. The leader contains a conserved RAT (ribonucleic antiterminator) motif which is recognized by the glucose sensing regulatory protein GlcT. The stabilization of this structure allows the RNA polymerase to proceed transcription of *glcA* mRNA. (C) The regulatory leader regions of *S. aureus pyrR* and *pyrP* mRNAs. The two regions contain a AGAGAG hairpin loop which was proposed to be the main recognition element for the regulatory protein PyrR in *B. subtilis* (1). In the presence of UMP, PyrR binds to the target mRNAs, and favors the formation of a terminator to induce premature termination of transcription. Alternative pairings leading to the formation of a terminator or of an anti-terminator structure are schematized by encircled grey and black residues.

Figure S4 -Geissmann et al.

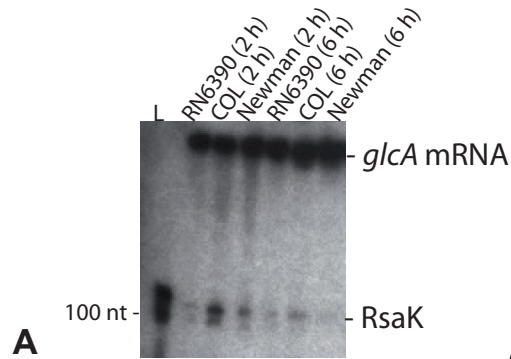

*glcA*

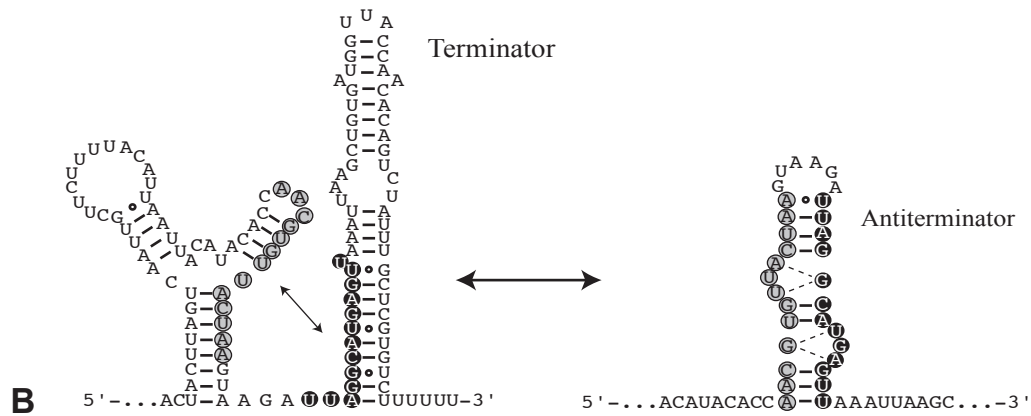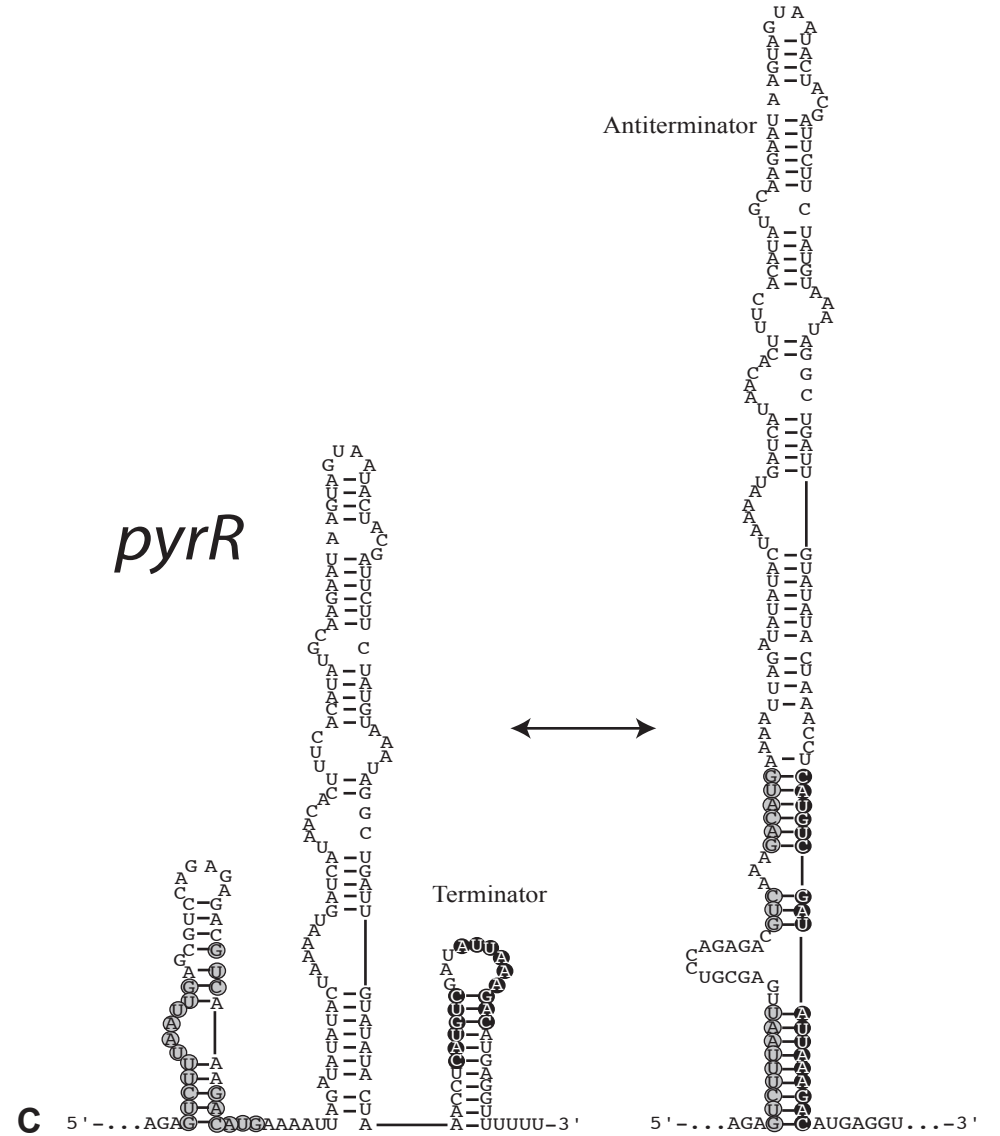

**Figure S5.** Genomic organization and sequence conservation of RsaE among *Staphylococcaceae* and *Bacillaceae*. (A) The *rsaE-rsaF* locus. RsaE is made from an autonomous IGR which contains a  $\sigma^A$ -consensus binding site located at the appropriate distance from the start site of *rsaE*, and a typical Rho-independent terminator of transcription (T1). In contrast to RsaE, RsaF is only present at high levels in strains expressing a fully active  $\sigma^B$  factor. A divergent  $\sigma^B$ -consensus binding site was predicting overlapping the  $\sigma^A$ -promoter. The size of RsaF (104 nts) was evaluated from Northern blots and the 5' start was determined by RACE. The presence of a longer RNA species on Northern blots suggests that RsaF may be the result of an endoribonuclease processing event. It remains to be determined whether the *S. aureus*-specific RsaF is functional, and the significance of the differential expression pattern of the two Rsa RNAs. (B) A schematic view of the sequence alignments of the intergenic region containing *rsaE* and *rsaF* from various *Staphylococcaceae* and *Bacillaceae*: 1-13, *S. aureus* Mu3, JH1, JH9, Mu50, MSSA476, MW2, USA300\_TCH1516, Newman, NCTC8325, USA300\_FPR3757, COL, MRSA252, and RF122, respectively; 14-15, *S. epidermidis* ATCC12228 and RP62A, respectively; 16, *S. haemolyticus* JCSC1435; 17, *S. saprophyticus* ATCC 15305; 18, *S. carnosus* TM300; 19, *Macrococcus caseolyticus* JCSC5402; 20, *Bacillus pumilus* SAFR-032; 21-22, *B. licheniformis* ATCC 14580 and DSM 13, respectively; 23, *B. subtilis* 168; 24, *B. amyloliquefaciens* FZB42; 25, *Anoxybacillus flavithermus* WK1; 26, *Lysinibacillus sphaericus* C3-41; 27-28, *B. anthracis* A0248 and CDC 684; 29-34, *B. cereus* 03BB102, Q1, G9842, AH820, B4264, and AH187, respectively; 35, *B. weihenstephanensis* KBAB4; 36-37 and 41-42, *B. cereus* cytotoxis NVH, ATCC 14579, ATCC 10987 and E33L, respectively; 38 and 40, *B. thuringiensis* Al Hakam and serovar konkukian str. 97-27, respectively; 43-44, *B. anthracis* Ames Ancestor and Ames, respectively; 45, *Geobacillus* sp. WCH70; 46, *G. thermodenitrificans* NG80-2; 47, *G. kaustophilus* HTA426. The alignment was performed using BlastN (<http://www.ncbi.nlm.nih.gov/blast/>). The five colors represent the alignment scores. The red line below the color code corresponds to the whole IGR comprises *rsaE-rsaF* of *S. aureus* N315 used as the reference sequence. The numbering of the nucleotides is given and the black arrows correspond to *rsaE* and *rsaF* genes. Only *rsaE* (except the terminator) shows a high degree of conservation in *Staphylococcaceae* and *Bacillaceae*, and the C-rich sequence motifs are strictly conserved in all strains (Fig. 3).

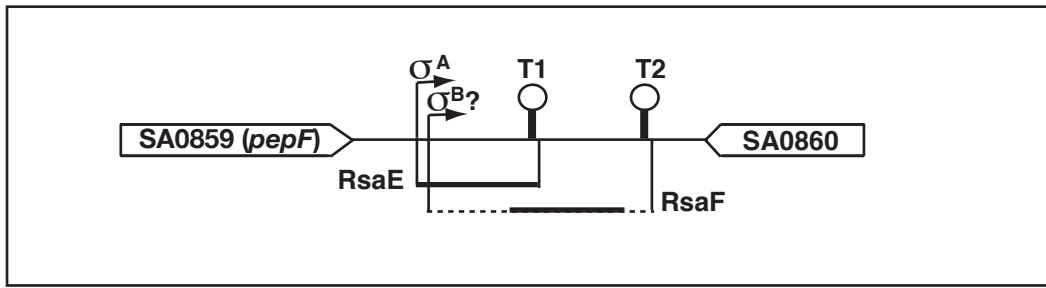

A

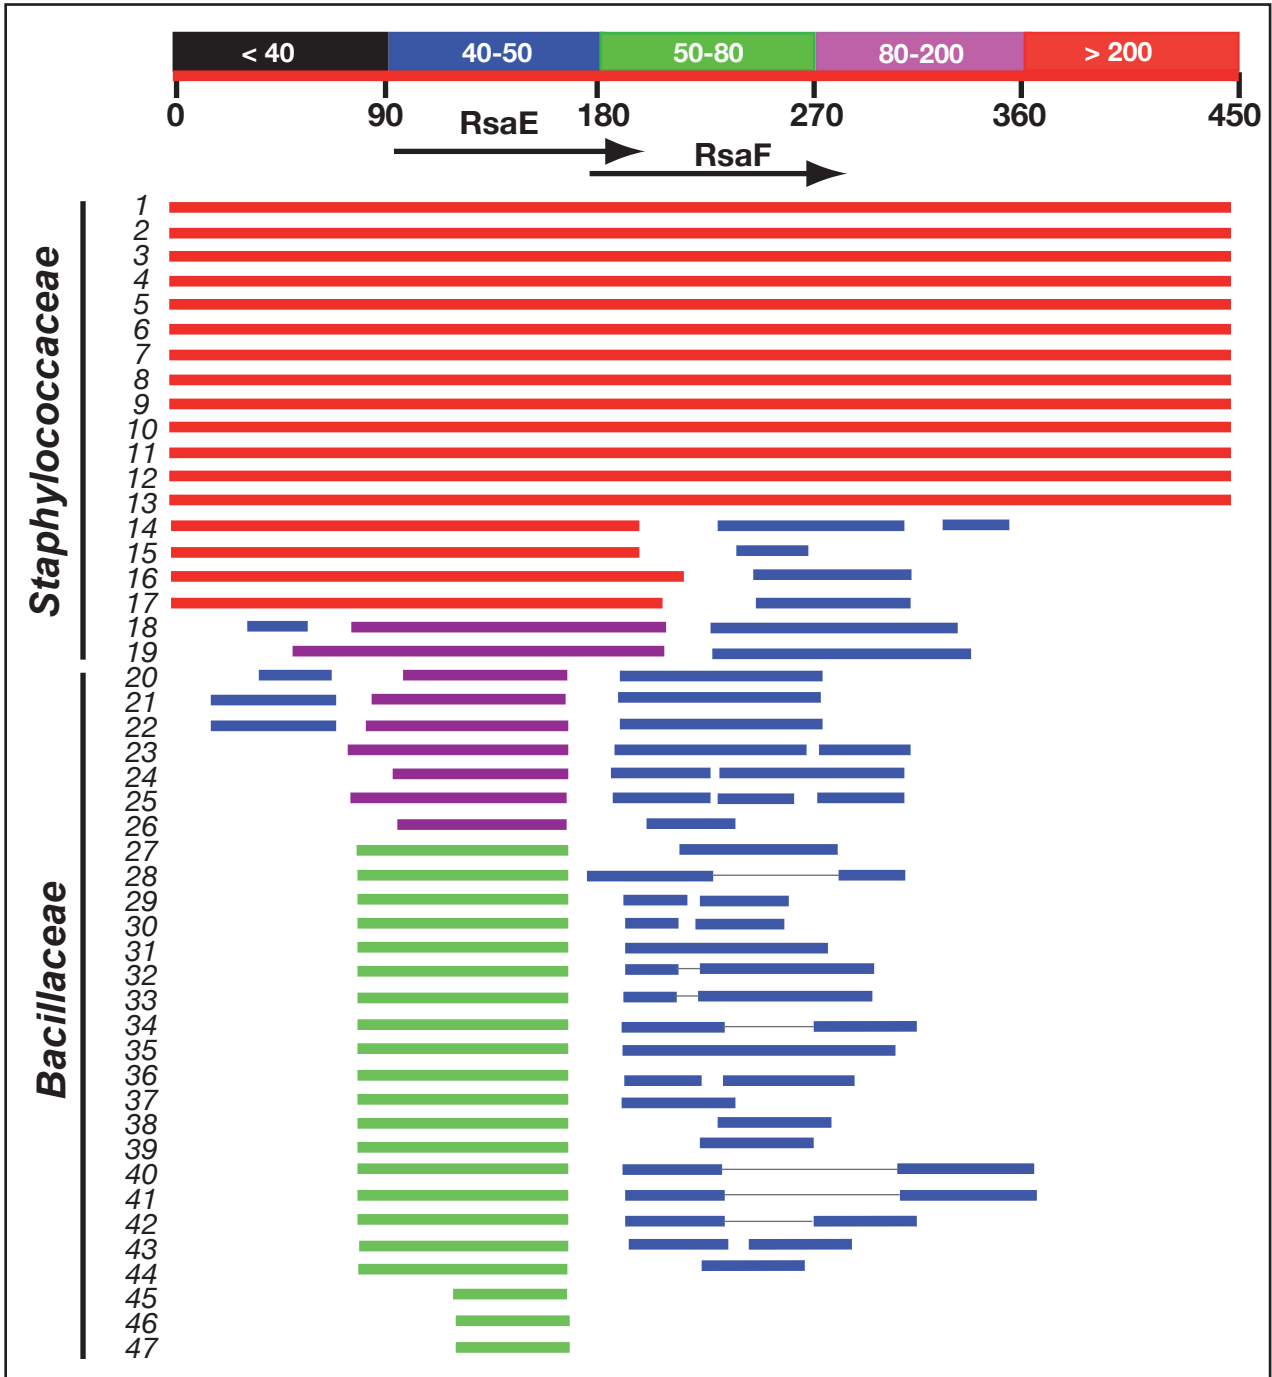

B

Figure S5- Geissmann et al.

**Figure S6.** Secondary structure of several Rsa RNAs. The secondary structures were predicted using RNAFold from the Vienna package (2). Strictly conserved nucleotides of RsaD, RsaH, and RsaI in four staphylococcal species (*S. aureus* N315, *S. epidermidis*, *S. saprophyticus*, and *S. haemolyticus*) are boxed. The conserved C-rich boxes are shown in red characters in RsaB, RsaC, RsaD, RsaH, and RsaJ.





**Figure S7.** *S. aureus* RsaA and its potential target mRNAs. (A) Secondary structure of RsaA. The nucleotides in red are strictly conserved in *S. aureus*, *S. epidermidis*, *S. saprophyticus*, and *S. haemolyticus*. (B) RsaA potentially forms stable complexes with the ribosome binding sites of several mRNAs which are repressed by  $\sigma^B$  (3,4). The minimum free energy was calculated with the cofold program for each duplex (Vienna Package, <http://rna.tbi.univie.ac.at/cgi-bin/RNACofold.cgi>). The Shine-Dalgarno (SD) sequence is given in red characters.



**Table S1.** List of predicted conserved IGRs selected by RNAsim.

| Start  | End    | strand | Conservation     | Comments                                  |
|--------|--------|--------|------------------|-------------------------------------------|
| 114    | 510    | +      | Staphylococcus   | Leader <i>dnaA</i>                        |
| 1956   | 2155   | +      | Firmicutes       | Leader <i>dnaN</i>                        |
| 3417   | 3585   | +      | <i>S. aureus</i> |                                           |
| 10609  | 10859  | +      | Staphylococcus   |                                           |
| 12441  | 12792  | +      | Firmicutes       | T-box upstream of <i>serS</i>             |
| 14417  | 14692  | +      | Staphylococcus   |                                           |
| 15776  | 16092  | +      | Firmicutes       | S-box-SAM riboswitch                      |
| 22218  | 22447  | +      | Staphylococcus   |                                           |
| 24336  | 24625  | +      | <i>S. aureus</i> | Livny et al. (5)                          |
| 30822  | 30996  | +      | <i>S. aureus</i> |                                           |
| 35750  | 36434  | +      | Staphylococcus   | Includes small ORF                        |
| 39893  | 40055  | -      | Firmicutes       | Upstream of <i>pre</i> +Term, HMM, C-Box  |
| 42881  | 43180  | +      | Staphylococcus   | HMM, RsaX01                               |
| 43481  | 43716  | +      | Staphylococcus   | RsaX01                                    |
| 49266  | 49722  | +      | Staphylococcus   |                                           |
| 53428  | 53638  | +      | Firmicutes       | Term upstream of SA0045                   |
| 54468  | 54805  | +      | <i>S. aureus</i> | Livny et al. (5)                          |
| 55552  | 56001  | +      | <i>S. aureus</i> | Cis-acting leader of <i>ermA</i>          |
| 62881  | 63210  | -      | Staphylococcus   | Livny et al. (5)                          |
| 66426  | 66629  | -      | Staphylococcus   | Livny et al. (5)                          |
| 68424  | 68723  | -      | Staphylococcus   |                                           |
| 71351  | 71650  | -      | Firmicutes       | Upstream of <i>tnp</i>                    |
| 72895  | 73149  | -      | Firmicutes       | Long IGR                                  |
| 76849  | 77115  | +      | Staphylococcus   | Includes small ORF                        |
| 81407  | 81949  | +      | Staphylococcus   | RsaX02, Livny et al. (5)                  |
| 87180  | 87668  | +      | Staphylococcus   |                                           |
| 89956  | 90119  | -      | Staphylococcus   | STAR                                      |
| 91349  | 91520  | +      | Staphylococcus   | Term upstream of SA0081                   |
| 95179  | 95634  | +      | Staphylococcus   | RsaX03, Marchais et al. (8)               |
| 96951  | 97164  | +      | <i>S. aureus</i> |                                           |
| 97632  | 97851  | +      | <i>S. aureus</i> |                                           |
| 98489  | 98727  | +      | <i>S. aureus</i> |                                           |
| 102443 | 102644 | +      | <i>S. aureus</i> |                                           |
| 103633 | 103851 | +      | Staphylococcus   |                                           |
| 115157 | 115385 | -      | <i>S. aureus</i> |                                           |
| 120468 | 120672 | +      | <i>S. aureus</i> |                                           |
| 122442 | 122644 | +      | <i>S. aureus</i> | Leader of <i>spa</i> , Roberts et al. (7) |
| 124209 | 124406 | -      | <i>S. aureus</i> |                                           |
| 125182 | 125542 | -      | Staphylococcus   |                                           |
| 141953 | 142143 | +      | <i>S. aureus</i> |                                           |
| 143771 | 143961 | +      | <i>S. aureus</i> |                                           |
| 147787 | 148049 | +      | Staphylococcus   |                                           |
| 148698 | 148998 | +      | <i>S. aureus</i> |                                           |
| 149745 | 149927 | +      | Staphylococcus   | RsaX04                                    |
| 150689 | 150922 | +      | <i>S. aureus</i> |                                           |
| 158609 | 158807 | +      | Staphylococcus   |                                           |
| 161970 | 162120 | +      | <i>S. aureus</i> |                                           |
| 164074 | 164428 | +      | <i>S. aureus</i> |                                           |
| 167221 | 167408 | +      | <i>S. aureus</i> |                                           |
| 184882 | 185158 | +      | <i>S. aureus</i> |                                           |
| 186732 | 186949 | +      | Staphylococcus   |                                           |
| 188293 | 188619 | +      | Staphylococcus   | STAR                                      |
| 189594 | 189781 | +      | <i>S. aureus</i> | Term upstream of SA0166                   |

|        |        |   |                  |                                                     |
|--------|--------|---|------------------|-----------------------------------------------------|
| 193338 | 193534 | + | <i>S. aureus</i> |                                                     |
| 195127 | 195484 | + | <i>S. aureus</i> |                                                     |
| 196748 | 197105 | + | <i>S. aureus</i> |                                                     |
| 210408 | 210644 | - | <i>S. aureus</i> |                                                     |
| 212086 | 212272 | - | <i>S. aureus</i> |                                                     |
| 217068 | 217417 | + | Firmicutes       | RsaK, leader of <i>glcA</i>                         |
| 222171 | 222426 | + | <i>S. aureus</i> |                                                     |
| 229090 | 229339 | + | <i>S. aureus</i> |                                                     |
| 232633 | 232800 | + | <i>S. aureus</i> |                                                     |
| 232830 | 233059 | + | <i>S. aureus</i> |                                                     |
| 243288 | 243477 | + | <i>S. aureus</i> |                                                     |
| 244236 | 244446 | + | <i>S. aureus</i> |                                                     |
| 252268 | 252525 | + | <i>S. aureus</i> |                                                     |
| 253038 | 253267 | + | Staphylococcus   |                                                     |
| 258499 | 258846 | + | <i>S. aureus</i> |                                                     |
| 264490 | 264674 | + | <i>S. aureus</i> |                                                     |
| 275317 | 275537 | + | <i>S. aureus</i> |                                                     |
| 276925 | 277225 | + | <i>S. aureus</i> |                                                     |
| 278704 | 278900 | - | <i>S. aureus</i> |                                                     |
| 279310 | 279599 | - | <i>S. aureus</i> | Small ORF (SAS007)                                  |
| 280772 | 281015 | + | <i>S. aureus</i> |                                                     |
| 281088 | 281255 | + | <i>S. aureus</i> | Roberts et al. (7)                                  |
| 284212 | 284494 | + | <i>S. aureus</i> |                                                     |
| 285503 | 285741 | + | <i>S. aureus</i> |                                                     |
| 292549 | 292777 | + | <i>S. aureus</i> |                                                     |
| 296522 | 296764 | + | <i>S. aureus</i> |                                                     |
| 297966 | 298168 | + | <i>S. aureus</i> |                                                     |
| 304334 | 304490 | + | <i>S. aureus</i> |                                                     |
| 311529 | 311757 | + | Staphylococcus   | STAR, HMM                                           |
| 312788 | 312948 | - | <i>S. aureus</i> |                                                     |
| 315234 | 315409 | - | <i>S. aureus</i> |                                                     |
| 316427 | 316782 | + | <i>S. aureus</i> |                                                     |
| 325672 | 325930 | - | <i>S. aureus</i> |                                                     |
| 326827 | 327089 | + | <i>S. aureus</i> |                                                     |
| 341093 | 341259 | + | <i>S. aureus</i> |                                                     |
| 345753 | 346269 | + | <i>S. aureus</i> |                                                     |
| 348343 | 348530 | - | <i>S. aureus</i> |                                                     |
| 349847 | 350002 | + | <i>S. aureus</i> |                                                     |
| 353312 | 353489 | + | <i>S. aureus</i> |                                                     |
| 354601 | 354868 | + | <i>S. aureus</i> |                                                     |
| 360696 | 360850 | + | Staphylococcus   |                                                     |
| 365096 | 365455 | + | Staphylococcus   |                                                     |
| 374306 | 374590 | + | <i>S. aureus</i> |                                                     |
| 379765 | 379926 | + | Staphylococcus   |                                                     |
| 383854 | 384128 | + | <i>S. aureus</i> |                                                     |
| 387801 | 388115 | + | Staphylococcus   | STAR, HMM                                           |
| 388699 | 388870 | + | <i>S. aureus</i> |                                                     |
| 394432 | 394587 | + | <i>S. aureus</i> |                                                     |
| 407471 | 407816 | + | Staphylococcus   | T-box upstream of SA0347, Marchais et al. (8)       |
| 407899 | 408121 | + | Staphylococcus   |                                                     |
| 412795 | 413226 | + | Firmicutes       | End of <i>rpsR</i> +Term and downstream of IGR+Term |
| 417756 | 417939 | + | <i>S. aureus</i> |                                                     |
| 418043 | 418608 | + | Firmicutes       | Includes SA0360 and downstream of IGR               |
| 423119 | 423530 | + | Staphylococcus   |                                                     |
| 428000 | 428312 | + | <i>S. aureus</i> |                                                     |

|        |        |     |                  |                                            |
|--------|--------|-----|------------------|--------------------------------------------|
| 430626 | 430930 | +   | Firmicutes       | Purine riboswitch upstream of <i>xprT</i>  |
| 438863 | 439249 | -   | <i>S. aureus</i> |                                            |
| 440633 | 440824 | +   | <i>S. aureus</i> |                                            |
| 442870 | 443053 | +   | <i>S. aureus</i> |                                            |
| 445513 | 445727 | +   | <i>S. aureus</i> |                                            |
| 453907 | 454123 | +   | <i>S. aureus</i> |                                            |
| 456769 | 457081 | +   | <i>S. aureus</i> |                                            |
| 464508 | 464684 | +   | <i>S. aureus</i> |                                            |
| 476027 | 476316 | +   | <i>S. aureus</i> |                                            |
| 484610 | 484907 | +   | <i>S. aureus</i> |                                            |
| 490504 | 490655 | +   | Staphylococcus   |                                            |
| 496737 | 496910 | +   | <i>S. aureus</i> | Upstream of tRNA                           |
| 497009 | 497168 | +   | <i>S. aureus</i> | Downstream of tRNA                         |
| 501512 | 501994 | +   | Firmicutes       | 4.5S RNA (SRP)                             |
| 505754 | 506160 | +   | Staphylococcus   | Upstream of rRNA                           |
| 507976 | 508186 | +   | Staphylococcus   | Between tRNA and 5.8S rRNA                 |
| 511304 | 511472 | +   | Staphylococcus   | Downstream of tRNA+term, Livny et al. (5)  |
| 511510 | 511749 | +   | Staphylococcus   | IGR+Term                                   |
| 511895 | 512130 | +   | Staphylococcus   | Term upstream of SA0439                    |
| 526716 | 526951 | +   | <i>S. aureus</i> |                                            |
| 530335 | 530625 | +   | <i>S. aureus</i> |                                            |
| 538614 | 538786 | +   | <i>S. aureus</i> |                                            |
| 542978 | 543170 | +   | <i>S. aureus</i> |                                            |
| 544110 | 544263 | +   | Staphylococcus   |                                            |
| 545202 | 545410 | +   | <i>S. aureus</i> |                                            |
| 547095 | 547406 | +   | Staphylococcus   | Term upstream of <i>lysS</i> , T-box       |
| 555815 | 556094 | +   | Staphylococcus   | Upstream of tRNA, IGR+Term                 |
| 560474 | 560625 | +   | Staphylococcus   |                                            |
| 565362 | 565614 | +   | <i>S. aureus</i> |                                            |
| 568157 | 568636 | +   | <i>S. aureus</i> |                                            |
| 570146 | 570317 | +   | Staphylococcus   | Term upstream of <i>cysE</i> , T-box       |
| 576540 | 576690 | +   | <i>S. aureus</i> | Leader of <i>rplA</i> , Roberts et al. (7) |
| 577440 | 577710 | +   | Staphylococcus   | L10 leader+Term, upstream of <i>rplJ</i>   |
| 578633 | 578795 | +   | Staphylococcus   | Term upstream of SA0499                    |
| 579409 | 579564 | +   | Staphylococcus   |                                            |
| 586955 | 587112 | +   | Staphylococcus   | Small ORF                                  |
| 587214 | 587416 | +   | Firmicutes       | Leader of <i>rpsL</i> , Roberts et al. (7) |
| 590574 | 590789 | +   | Staphylococcus   | Term upstream of <i>tufA</i>               |
| 591975 | 592251 | +   | Staphylococcus   |                                            |
| 594790 | 595053 | +   | <i>S. aureus</i> |                                            |
| 597734 | 597896 | +   | Staphylococcus   |                                            |
| 604788 | 605214 | +   | <i>S. aureus</i> |                                            |
| 608160 | 608441 | +   | <i>S. aureus</i> |                                            |
| 612630 | 612992 | +   | <i>S. aureus</i> |                                            |
| 619632 | 619904 | -   | <i>S. aureus</i> |                                            |
| 621878 | 622099 | +   | <i>S. aureus</i> |                                            |
| 625046 | 625392 | +   | Staphylococcus   |                                            |
| 630855 | 631008 | +   | <i>S. aureus</i> |                                            |
| 631050 | 631324 | +   | <i>S. aureus</i> |                                            |
| 632189 | 632341 | +   | <i>S. aureus</i> |                                            |
| 636758 | 637304 | +/- | Staphylococcus   | RsaA (+ strand)                            |
| 640216 | 640541 | +   | Staphylococcus   |                                            |
| 646069 | 646253 | +   | <i>S. aureus</i> |                                            |
| 646366 | 646552 | +   | <i>S. aureus</i> |                                            |
| 650163 | 650446 | +   | <i>S. aureus</i> |                                            |

|        |        |   |                  |                                                                  |
|--------|--------|---|------------------|------------------------------------------------------------------|
| 651569 | 651954 | + | Staphylococcus   | STAR, HMM, Livny et al. (5)                                      |
| 652533 | 652685 | + | <i>S. aureus</i> |                                                                  |
| 655059 | 655507 | + | <i>S. aureus</i> |                                                                  |
| 656598 | 656828 | + | <i>S. aureus</i> | Upstream of SA0563- <i>argS</i> , T-box ?                        |
| 659828 | 660066 | + | <i>S. aureus</i> | RsaX06                                                           |
| 665140 | 665294 | + | <i>S. aureus</i> |                                                                  |
| 666098 | 666298 | + | Staphylococcus   | RsaX07                                                           |
| 666842 | 667117 | - | Staphylococcus   |                                                                  |
| 667125 | 667630 | - | Staphylococcus   |                                                                  |
| 669192 | 669369 | + | <i>S. aureus</i> |                                                                  |
| 675825 | 676113 | + | <i>S. aureus</i> |                                                                  |
| 679723 | 680024 | - | <i>S. aureus</i> | RsaC                                                             |
| 680509 | 680738 | - | <i>S. aureus</i> | RsaC                                                             |
| 686710 | 687007 | + | <i>S. aureus</i> |                                                                  |
| 692039 | 692383 | + | <i>S. aureus</i> |                                                                  |
| 694133 | 694433 | + | <i>S. aureus</i> |                                                                  |
| 695728 | 696143 | + | Staphylococcus   | RsaD, Livny et al. (5)                                           |
| 697192 | 697355 | + | Staphylococcus   |                                                                  |
| 703029 | 703495 | + | <i>S. aureus</i> |                                                                  |
| 712969 | 713456 | + | Staphylococcus   |                                                                  |
| 715250 | 715686 | + | <i>S. aureus</i> |                                                                  |
| 716497 | 716842 | + | Staphylococcus   |                                                                  |
| 717493 | 718174 | + | <i>S. aureus</i> |                                                                  |
| 720870 | 721025 | + | <i>S. aureus</i> |                                                                  |
| 722073 | 722559 | + | Staphylococcus   |                                                                  |
| 728170 | 728344 | + | Staphylococcus   |                                                                  |
| 731774 | 731963 | + | Staphylococcus   |                                                                  |
| 735892 | 736086 | + | Staphylococcus   |                                                                  |
| 738044 | 738220 | + | Staphylococcus   |                                                                  |
| 741648 | 741935 | + | Staphylococcus   |                                                                  |
| 742699 | 742879 | - | <i>S. aureus</i> |                                                                  |
| 744682 | 744959 | + | Staphylococcus   |                                                                  |
| 746121 | 746316 | + | Staphylococcus   |                                                                  |
| 749975 | 750264 | + | <i>S. aureus</i> |                                                                  |
| 751463 | 751682 | + | Staphylococcus   |                                                                  |
| 753034 | 753240 | + | <i>S. aureus</i> |                                                                  |
| 757175 | 757551 | - | Staphylococcus   |                                                                  |
| 758259 | 758527 | - | <i>S. aureus</i> |                                                                  |
| 761087 | 761229 | + | Staphylococcus   | RsaX08, pre-Q1 riboswitch upstream of SA0668 Marchais et al. (8) |
| 765821 | 766226 | + | Staphylococcus   |                                                                  |
| 768200 | 768422 | + | Staphylococcus   |                                                                  |
| 772138 | 772335 | + | <i>S. aureus</i> |                                                                  |
| 776137 | 776453 | + | Staphylococcus   | STAR, HMM, Livny et al. (5)                                      |
| 777120 | 777557 | + | Staphylococcus   | STAR, HMM, Livny et al. (5)                                      |
| 780748 | 780920 | - | <i>S. aureus</i> |                                                                  |
| 782415 | 782637 | + | <i>S. aureus</i> |                                                                  |
| 782659 | 783086 | + | Staphylococcus   | Purine riboswitch upstream of <i>nrdI</i>                        |
| 790883 | 791038 | + | Staphylococcus   | STAR                                                             |
| 794592 | 794959 | + | <i>S. aureus</i> |                                                                  |
| 798801 | 798968 | - | Staphylococcus   |                                                                  |
| 800069 | 800355 | + | Staphylococcus   |                                                                  |
| 803253 | 803584 | + | <i>S. aureus</i> |                                                                  |
| 805998 | 806284 | + | <i>S. aureus</i> |                                                                  |
| 808967 | 809331 | + | Staphylococcus   | Includes small ORF                                               |
| 810429 | 810772 | + | <i>S. aureus</i> | Includes small ORF                                               |

|        |        |   |                  |                                              |
|--------|--------|---|------------------|----------------------------------------------|
| 812626 | 812888 | + | <i>S. aureus</i> |                                              |
| 817939 | 818247 | + | Staphylococcus   | STAR, HMM                                    |
| 823225 | 824090 | + | Staphylococcus   | STAR, HMM                                    |
| 827069 | 827237 | + | <i>S. aureus</i> |                                              |
| 827447 | 827597 | + | Staphylococcus   |                                              |
| 828251 | 828448 | + | <i>S. aureus</i> |                                              |
| 829368 | 829873 | + | Staphylococcus   | RsaH, Livny et al. (5)                       |
| 830837 | 831322 | + | Staphylococcus   | STAR, HMM                                    |
| 838883 | 839113 | + | <i>S. aureus</i> |                                              |
| 839881 | 840052 | + | Staphylococcus   |                                              |
| 844742 | 845141 | + | Staphylococcus   | Downstream of tmRNA                          |
| 846434 | 847030 | + | <i>S. aureus</i> |                                              |
| 848235 | 848481 | + | <i>S. aureus</i> |                                              |
| 851455 | 851614 | + | <i>S. aureus</i> |                                              |
| 853205 | 853501 | + | <i>S. aureus</i> |                                              |
| 854562 | 854863 | + | <i>S. aureus</i> |                                              |
| 855441 | 855747 | + | Firmicutes       | Upstream of SA0746 (staphylococcal nuclease) |
| 856473 | 856765 | + | Staphylococcus   |                                              |
| 857190 | 857552 | + | Staphylococcus   | Term far upstream of SA0748                  |
| 859310 | 859768 | + | <i>S. aureus</i> |                                              |
| 865573 | 865726 | + | Staphylococcus   | Roberts et al. (7)                           |
| 872157 | 872606 | + | <i>S. aureus</i> |                                              |
| 873353 | 873699 | + | <i>S. aureus</i> | Livny et al. (5)                             |
| 873882 | 874206 | + | Staphylococcus   | STAR, HMM                                    |
| 874260 | 874502 | + | Staphylococcus   | STAR, HMM                                    |
| 875429 | 875597 | + | Firmicutes       | SAM riboswitch upstream of SA0769            |
| 878278 | 878529 | + | <i>S. aureus</i> |                                              |
| 879854 | 880109 | + | Staphylococcus   | Includes small ORF                           |
| 886286 | 886588 | + | <i>S. aureus</i> |                                              |
| 893715 | 893905 | + | Staphylococcus   |                                              |
| 897895 | 898263 | + | <i>S. aureus</i> | Includes small ORF                           |
| 904608 | 904758 | + | <i>S. aureus</i> |                                              |
| 912118 | 912341 | - | <i>S. aureus</i> |                                              |
| 920248 | 920429 | + | <i>S. aureus</i> |                                              |
| 921586 | 921871 | + | <i>S. aureus</i> |                                              |
| 924454 | 924635 | + | Staphylococcus   | STAR, HMM                                    |
| 928516 | 928811 | + | Staphylococcus   |                                              |
| 930204 | 930359 | + | <i>S. aureus</i> |                                              |
| 939508 | 939672 | + | Staphylococcus   |                                              |
| 941308 | 941464 | + | <i>S. aureus</i> |                                              |
| 944084 | 944612 | + | Staphylococcus   | STAR                                         |
| 953726 | 953966 | + | <i>S. aureus</i> |                                              |
| 954414 | 954644 | + | <i>S. aureus</i> |                                              |
| 954859 | 955148 | + | <i>S. aureus</i> | Term upstream of <i>fabh</i> , riboswitch ?  |
| 957808 | 957990 | + | Staphylococcus   |                                              |
| 963726 | 963926 | + | <i>S. aureus</i> |                                              |
| 970542 | 970834 | + | Staphylococcus   |                                              |
| 971369 | 971600 | + | Staphylococcus   |                                              |
| 975288 | 975460 | + | Firmicutes       | RsaE, Livny et al. (5)                       |
| 975460 | 975740 | + | <i>S. aureus</i> | RsaF                                         |
| 977641 | 977812 | + | <i>S. aureus</i> |                                              |
| 983797 | 984032 | + | <i>S. aureus</i> |                                              |
| 986113 | 986457 | + | <i>S. aureus</i> |                                              |
| 988928 | 989089 | + | Staphylococcus   |                                              |
| 992059 | 992486 | + | Staphylococcus   |                                              |

|         |         |   |                  |                                                      |
|---------|---------|---|------------------|------------------------------------------------------|
| 996902  | 997115  | + | <i>S. aureus</i> |                                                      |
| 1002460 | 1002628 | + | <i>S. aureus</i> | upstream of tRNA gene                                |
| 1003508 | 1003661 | - | <i>S. aureus</i> |                                                      |
| 1003804 | 1004015 | - | Staphylococcus   | In antisense orientation to SA0883                   |
| 1006559 | 1006849 | + | <i>S. aureus</i> |                                                      |
| 1010523 | 1010773 | + | <i>S. aureus</i> | Long IGR                                             |
| 1011366 | 1011547 | + | <i>S. aureus</i> |                                                      |
| 1013265 | 1013422 | + | <i>S. aureus</i> |                                                      |
| 1019781 | 1019947 | + | <i>S. aureus</i> | Downstream of <i>memb</i> , Potential sRNA with Term |
| 1022764 | 1022962 | - | <i>S. aureus</i> |                                                      |
| 1023012 | 1023200 | - | <i>S. aureus</i> |                                                      |
| 1032642 | 1033043 | + | Staphylococcus   |                                                      |
| 1039067 | 1039361 | - | <i>S. aureus</i> |                                                      |
| 1039680 | 1040504 | - | Staphylococcus   | STAR, HMM                                            |
| 1041406 | 1041601 | + | Staphylococcus   |                                                      |
| 1052839 | 1053096 | + | Staphylococcus   |                                                      |
| 1055907 | 1056798 | + | Firmicutes       | Antisense orientation of TPP, repeat elements        |
| 1058320 | 1058707 | + | <i>S. aureus</i> |                                                      |
| 1062659 | 1063092 | + | Staphylococcus   |                                                      |
| 1066487 | 1066727 | + | Staphylococcus   | Livny et al. (5)                                     |
| 1068543 | 1069063 | - | Firmicutes       |                                                      |
| 1069685 | 1069846 | + | <i>S. aureus</i> |                                                      |
| 1083867 | 1084046 | - | Staphylococcus   |                                                      |
| 1085788 | 1085953 | + | Staphylococcus   |                                                      |
| 1087945 | 1088099 | + | <i>S. aureus</i> |                                                      |
| 1089128 | 1089413 | + | <i>S. aureus</i> |                                                      |
| 1090887 | 1091225 | + | Staphylococcus   |                                                      |
| 1095856 | 1096173 | + | Staphylococcus   |                                                      |
| 1097586 | 1097756 | + | <i>S. aureus</i> |                                                      |
| 1106608 | 1106790 | - | <i>S. aureus</i> |                                                      |
| 1107856 | 1108058 | + | <i>S. aureus</i> |                                                      |
| 1112944 | 1113182 | + | <i>S. aureus</i> |                                                      |
| 1113949 | 1114289 | + | Firmicutes       | T-box upstream of <i>pheS</i>                        |
| 1119148 | 1119545 | + | <i>S. aureus</i> |                                                      |
| 1127040 | 1127317 | + | Staphylococcus   |                                                      |
| 1130625 | 1130822 | + | <i>S. aureus</i> |                                                      |
| 1132777 | 1133220 | + | <i>S. aureus</i> | Includes small ORF                                   |
| 1134351 | 1134993 | + | <i>S. aureus</i> | Term upstream of SA1002                              |
| 1135503 | 1135759 | + | <i>S. aureus</i> |                                                      |
| 1136760 | 1137488 | + | Staphylococcus   | STAR, HMM, Livny et al. (5)                          |
| 1137644 | 1137875 | + | <i>S. aureus</i> | Long IGR                                             |
| 1137937 | 1138593 | + | <i>S. aureus</i> | Long IGR                                             |
| 1138630 | 1139083 | + | Staphylococcus   | RsaX10                                               |
| 1141537 | 1142098 | - | <i>S. aureus</i> |                                                      |
| 1142166 | 1143006 | - | Staphylococcus   | STAR, HMM                                            |
| 1145459 | 1145817 | + | Staphylococcus   |                                                      |
| 1149556 | 1149966 | + | Staphylococcus   | Includes small ORF                                   |
| 1151613 | 1151839 | - | Staphylococcus   | STAR                                                 |
| 1151978 | 1152191 | - | <i>S. aureus</i> | Upstream of tRNA gene                                |
| 1152270 | 1152713 | + | Staphylococcus   | Upstream of small ORF                                |
| 1154325 | 1154496 | + | <i>S. aureus</i> |                                                      |
| 1166960 | 1167207 | + | <i>S. aureus</i> |                                                      |
| 1171092 | 1171307 | + | Staphylococcus   | T-box upstream of <i>ileS</i>                        |
| 1175179 | 1175939 | + | Staphylococcus   | STAR, HMM, RsaX11                                    |
| 1177413 | 1177766 | + | Staphylococcus   | Cis-regulatory leader <i>pyrR</i>                    |



|         |         |   |                  |                                                 |
|---------|---------|---|------------------|-------------------------------------------------|
| 1178313 | 1178505 | + | Staphylococcus   | Cis-regulatory leader <i>pyrP</i> (PyrR)        |
| 1187782 | 1188280 | + | <i>S. aureus</i> |                                                 |
| 1188815 | 1188998 | + | <i>S. aureus</i> |                                                 |
| 1191840 | 1192077 | + | <i>S. aureus</i> |                                                 |
| 1195742 | 1196199 | + | <i>S. aureus</i> |                                                 |
| 1197660 | 1197816 | + | Staphylococcus   |                                                 |
| 1204379 | 1204587 | + | <i>S. aureus</i> |                                                 |
| 1207056 | 1207252 | + | Firmicutes       | Long IGR, antisense orientation to <i>rpmB</i>  |
| 1207368 | 1207623 | + | Staphylococcus   | Long IGR                                        |
| 1209822 | 1210010 | + | <i>S. aureus</i> |                                                 |
| 1212081 | 1212259 | + | Staphylococcus   |                                                 |
| 1215618 | 1215904 | + | Staphylococcus   | Repeats, Term 80 nt upstream of <i>hmrB</i>     |
| 1223881 | 1224165 | + | Firmicutes       | Leader of <i>rpsP</i>                           |
| 1229115 | 1229512 | + | <i>S. aureus</i> |                                                 |
| 1235976 | 1236140 | + | <i>S. aureus</i> |                                                 |
| 1237018 | 1237171 | + | Staphylococcus   |                                                 |
| 1240749 | 1241012 | + | <i>S. aureus</i> |                                                 |
| 1245038 | 1245198 | + | Staphylococcus   | Leader of <i>rpsB</i>                           |
| 1245984 | 1246147 | + | Firmicutes       | Small ORF, leader of EF-TS                      |
| 1248617 | 1248800 | + | Staphylococcus   | Term upstream of <i>uppS</i> , Livny et al. (5) |
| 1250407 | 1250591 | + | <i>S. aureus</i> |                                                 |
| 1253679 | 1253869 | + | <i>S. aureus</i> |                                                 |
| 1263619 | 1263776 | + | <i>S. aureus</i> | Leader of <i>truB-ribC-rpsO</i>                 |
| 1265989 | 1266427 | + | Staphylococcus   | Leader of <i>pnpA</i>                           |
| 1270493 | 1270665 | + | <i>S. aureus</i> |                                                 |
| 1279039 | 1279226 | + | <i>S. aureus</i> |                                                 |
| 1280406 | 1280564 | + | Staphylococcus   |                                                 |
| 1281617 | 1281966 | + | Staphylococcus   |                                                 |
| 1283591 | 1283812 | + | <i>S. aureus</i> |                                                 |
| 1283831 | 1284194 | + | Staphylococcus   |                                                 |
| 1290733 | 1291002 | + | <i>S. aureus</i> |                                                 |
| 1296413 | 1296565 | + | <i>S. aureus</i> |                                                 |
| 1306539 | 1306761 | + | <i>S. aureus</i> |                                                 |
| 1309256 | 1309601 | + | <i>S. aureus</i> |                                                 |
| 1309685 | 1310025 | + | Staphylococcus   |                                                 |
| 1310031 | 1310492 | + | <i>S. aureus</i> | Includes small ORF                              |
| 1310499 | 1311089 | + | <i>S. aureus</i> | Includes small ORF                              |
| 1311163 | 1311668 | + | <i>S. aureus</i> |                                                 |
| 1311817 | 1312415 | + | <i>S. aureus</i> | Includes small ORF                              |
| 1312805 | 1313249 | + | Staphylococcus   | Includes small ORF                              |
| 1313887 | 1314054 | + | Staphylococcus   | Includes small ORF                              |
| 1314277 | 1314447 | + | <i>S. aureus</i> |                                                 |
| 1315518 | 1315773 | + | <i>S. aureus</i> |                                                 |
| 1317511 | 1317692 | + | <i>S. aureus</i> |                                                 |
| 1322977 | 1323131 | + | <i>S. aureus</i> |                                                 |
| 1325311 | 1325491 | + | Staphylococcus   |                                                 |
| 1329618 | 1329858 | + | <i>S. aureus</i> |                                                 |
| 1331898 | 1332087 | + | Staphylococcus   |                                                 |
| 1336837 | 1337115 | + | <i>S. aureus</i> | Includes small ORF                              |
| 1337755 | 1337964 | + | Staphylococcus   | Includes small ORF                              |
| 1338420 | 1338619 | + | Staphylococcus   | Includes small ORF                              |
| 1340640 | 1340865 | + | <i>S. aureus</i> |                                                 |
| 1346496 | 1346695 | + | Staphylococcus   |                                                 |
| 1348594 | 1349059 | + | Staphylococcus   | STAR, HMM                                       |
| 1352000 | 1352173 | + | <i>S. aureus</i> |                                                 |

|         |         |   |                  |                                                     |
|---------|---------|---|------------------|-----------------------------------------------------|
| 1352697 | 1352869 | + | <i>S. aureus</i> |                                                     |
| 1360589 | 1360804 | + | <i>S. aureus</i> |                                                     |
| 1363256 | 1363611 | + | <i>S. aureus</i> |                                                     |
| 1366136 | 1366335 | + | <i>S. aureus</i> |                                                     |
| 1368171 | 1368382 | + | Firmicutes       |                                                     |
| 1378888 | 1379152 | + | <i>S. aureus</i> |                                                     |
| 1381748 | 1382022 | + | <i>S. aureus</i> |                                                     |
| 1387702 | 1387901 | - | <i>S. aureus</i> |                                                     |
| 1388353 | 1388520 | + | <i>S. aureus</i> |                                                     |
| 1395079 | 1395520 | - | Staphylococcus   | STAR, HMM                                           |
| 1395695 | 1395951 | - | Firmicutes       | Includes small ORF                                  |
| 1398843 | 1399123 | + | Staphylococcus   | RsaX12 upstream of lysine riboswitch                |
| 1399339 | 1399740 | + | Staphylococcus   | Lysine riboswitch upstream of <i>lysC</i>           |
| 1408636 | 1408787 | - | <i>S. aureus</i> |                                                     |
| 1408937 | 1409164 | - | Firmicutes       | Leader of <i>cspA</i>                               |
| 1409542 | 1409751 | + | Staphylococcus   |                                                     |
| 1413176 | 1413388 | - | <i>S. aureus</i> |                                                     |
| 1417320 | 1417878 | - | Staphylococcus   |                                                     |
| 1424188 | 1424971 | - | Staphylococcus   | Upstream of truncated <i>arlR</i>                   |
| 1427366 | 1427562 | - | <i>S. aureus</i> |                                                     |
| 1432388 | 1432583 | - | <i>S. aureus</i> |                                                     |
| 1433547 | 1433788 | - | <i>S. aureus</i> |                                                     |
| 1436007 | 1436171 | + | <i>S. aureus</i> |                                                     |
| 1437004 | 1437246 | + | Staphylococcus   | STAR, HMM, Livny et al. (5)                         |
| 1469803 | 1470083 | - | <i>S. aureus</i> |                                                     |
| 1475356 | 1475822 | - | <i>S. aureus</i> |                                                     |
| 1480194 | 1480447 | + | <i>S. aureus</i> |                                                     |
| 1483726 | 1484114 | - | Firmicutes       | RNase P, HMM                                        |
| 1485561 | 1485911 | + | <i>S. aureus</i> |                                                     |
| 1491105 | 1491401 | - | <i>S. aureus</i> |                                                     |
| 1492707 | 1492871 | - | Staphylococcus   |                                                     |
| 1499069 | 1499225 | - | <i>S. aureus</i> |                                                     |
| 1499634 | 1499839 | - | <i>S. aureus</i> |                                                     |
| 1506684 | 1507446 | - | <i>S. aureus</i> |                                                     |
| 1510729 | 1511138 | - | Firmicutes       | Leader of <i>hu</i>                                 |
| 1514878 | 1515160 | - | Staphylococcus   |                                                     |
| 1515273 | 1515551 | - | <i>S. aureus</i> |                                                     |
| 1523885 | 1524137 | - | Firmicutes       | FMN upstream of SA1316, HMM                         |
| 1530598 | 1530818 | - | <i>S. aureus</i> |                                                     |
| 1544160 | 1544364 | + | Staphylococcus   |                                                     |
| 1550247 | 1550438 | - | <i>S. aureus</i> |                                                     |
| 1553370 | 1553696 | - | <i>S. aureus</i> |                                                     |
| 1562522 | 1562927 | - | <i>S. aureus</i> |                                                     |
| 1568050 | 1568228 | - | Staphylococcus   |                                                     |
| 1571964 | 1572117 | + | <i>S. aureus</i> |                                                     |
| 1577475 | 1577690 | - | <i>S. aureus</i> |                                                     |
| 1583172 | 1583325 | - | Staphylococcus   |                                                     |
| 1585629 | 1585811 | - | Firmicutes       | Leader of <i>rpmG</i>                               |
| 1588657 | 1588896 | - | <i>S. aureus</i> |                                                     |
| 1600077 | 1600363 | + | Staphylococcus   | T-Box upstream of <i>glyS</i> , Marchais et al. (8) |
| 1605769 | 1606026 | - | <i>S. aureus</i> |                                                     |
| 1608584 | 1609165 | - | Firmicutes       | Leader of <i>rpsU</i>                               |
| 1618277 | 1618638 | - | Staphylococcus   | STAR, HMM                                           |
| 1620964 | 1621273 | - | Firmicutes       | In antisense orientation to <i>rpsT</i>             |
| 1631726 | 1631958 | - | <i>S. aureus</i> |                                                     |

|         |         |     |                  |                                                                    |
|---------|---------|-----|------------------|--------------------------------------------------------------------|
| 1632072 | 1632346 | -   | <i>S. aureus</i> | Includes part of SA1429                                            |
| 1632385 | 1632595 | -   | <i>S. aureus</i> | Includes part of SA1429                                            |
| 1633477 | 1633790 | -   | <i>S. aureus</i> | Upstream of STAR, HMM, Livny et al. (5)                            |
| 1640858 | 1641060 | -   | <i>S. aureus</i> |                                                                    |
| 1645154 | 1645434 | -   | Staphylococcus   |                                                                    |
| 1649154 | 1649422 | -   | Firmicutes       | T-box upstream of <i>alaS</i>                                      |
| 1652768 | 1653061 | -   | Staphylococcus   | STAR, HMM, Livny et al. (5)                                        |
| 1660490 | 1660646 | -   | Staphylococcus   | Roberts et al. (7)                                                 |
| 1663947 | 1664110 | -   | Staphylococcus   | T-Box upstream of <i>hisS</i> , HMM, Livny et al. (5)              |
| 1667827 | 1668128 | -   | <i>S. aureus</i> |                                                                    |
| 1671068 | 1671269 | -   | <i>S. aureus</i> |                                                                    |
| 1682744 | 1682923 | -   | Staphylococcus   |                                                                    |
| 1683462 | 1683761 | -   | Staphylococcus   |                                                                    |
| 1685414 | 1685863 | +   | Firmicutes       | Cis-regulatory leader of <i>ermA</i>                               |
| 1696574 | 1696752 | +   | Firmicutes       | T-box upstream of <i>valS</i>                                      |
| 1705181 | 1705379 | -   | Staphylococcus   |                                                                    |
| 1711867 | 1712034 | -   | Firmicutes       | L20 leader upstream of <i>infC</i>                                 |
| 1713606 | 1713993 | -   | Firmicutes       | Lysine riboswitch upstream of <i>lysP</i>                          |
| 1715961 | 1716354 | -   | Firmicutes       | T-box upstream of <i>thrS</i> , HMM                                |
| 1720401 | 1720569 | -   | Staphylococcus   |                                                                    |
| 1724751 | 1725005 | -   | <i>S. aureus</i> |                                                                    |
| 1726510 | 1726993 | -   | <i>S. aureus</i> |                                                                    |
| 1732201 | 1732547 | +   | Staphylococcus   |                                                                    |
| 1734098 | 1734256 | +   | <i>S. aureus</i> |                                                                    |
| 1736967 | 1737251 | -   | Staphylococcus   | Livny et al. (5)                                                   |
| 1740661 | 1740878 | -   | <i>S. aureus</i> |                                                                    |
| 1745150 | 1745402 | -   | Staphylococcus   | STAR, HMM, Term upstream of SA1526                                 |
| 1746749 | 1746903 | +   | <i>S. aureus</i> |                                                                    |
| 1758029 | 1758239 | -   | <i>S. aureus</i> |                                                                    |
| 1761531 | 1761713 | +   | Staphylococcus   |                                                                    |
| 1771001 | 1771159 | +   | Staphylococcus   |                                                                    |
| 1773791 | 1774166 | +   | Staphylococcus   | T-box upstream of <i>tyrS</i>                                      |
| 1775089 | 1775274 | +   | Staphylococcus   |                                                                    |
| 1777967 | 1778142 | +/- | <i>S. aureus</i> | RsaB (+ strand)                                                    |
| 1780001 | 1780272 | -   | <i>S. aureus</i> |                                                                    |
| 1785343 | 1785657 | -   | <i>S. aureus</i> |                                                                    |
| 1787090 | 1787505 | -   | <i>S. aureus</i> |                                                                    |
| 1799158 | 1799538 | -   | <i>S. aureus</i> |                                                                    |
| 1801010 | 1801172 | -   | Staphylococcus   | RsaX14                                                             |
| 1801193 | 1801556 | -   | Staphylococcus   | RsaX14                                                             |
| 1803836 | 1804170 | -   | Staphylococcus   | STAR, HMM                                                          |
| 1804196 | 1804363 | -   | Staphylococcus   | STAR, HMM                                                          |
| 1807199 | 1807350 | +   | <i>S. aureus</i> |                                                                    |
| 1815565 | 1815759 | -   | <i>S. aureus</i> |                                                                    |
| 1822306 | 1822720 | -   | <i>S. aureus</i> |                                                                    |
| 1823612 | 1823809 | +   | Staphylococcus   |                                                                    |
| 1828395 | 1828720 | -   | Firmicutes       | FMN upstream of <i>ribD</i> , HMM                                  |
| 1830320 | 1830823 | +   | <i>S. aureus</i> | Term upstream of SA1591                                            |
| 1833394 | 1833678 | +   | Staphylococcus   |                                                                    |
| 1833892 | 1834060 | +   | Staphylococcus   |                                                                    |
| 1835663 | 1835820 | +   | <i>S. aureus</i> |                                                                    |
| 1839186 | 1839704 | +   | Staphylococcus   | RsaX15, HMM                                                        |
| 1839706 | 1839931 | +   | Firmicutes       | Truncated transposase                                              |
| 1844412 | 1844781 | +   | Firmicutes       | Leader of <i>pckA</i> , in antisense orientation to SAM riboswitch |
| 1850782 | 1850936 | -   | <i>S. aureus</i> |                                                                    |

|         |         |   |                  |                                                                                             |
|---------|---------|---|------------------|---------------------------------------------------------------------------------------------|
| 1851426 | 1851728 | + | <i>S. aureus</i> |                                                                                             |
| 1856369 | 1856798 | + | Staphylococcus   | sprA, Pichon and Felden (6), HMM                                                            |
| 1857482 | 1857823 | - | Staphylococcus   |                                                                                             |
| 1860738 | 1861018 | - | <i>S. aureus</i> |                                                                                             |
| 1865118 | 1865490 | + | <i>S. aureus</i> | Term upstream of <i>splA</i>                                                                |
| 1865836 | 1866079 | + | <i>S. aureus</i> |                                                                                             |
| 1866672 | 1867028 | + | <i>S. aureus</i> | sprB, Pichon and Felden (6)                                                                 |
| 1867248 | 1867528 | + | <i>S. aureus</i> | Downstream of sprB                                                                          |
| 1871172 | 1871931 | + | Staphylococcus   | sprC, Pichon and Felden (6)                                                                 |
| 1873386 | 1873642 | + | Staphylococcus   |                                                                                             |
| 1873858 | 1874112 | + | Staphylococcus   |                                                                                             |
| 1877123 | 1877283 | - | <i>S. aureus</i> |                                                                                             |
| 1881673 | 1881834 | - | <i>S. aureus</i> | Downstream of tRNA cluster                                                                  |
| 1882658 | 1882992 | - | <i>S. aureus</i> | Upstream of tRNA cluster                                                                    |
| 1883713 | 1883866 | - | <i>S. aureus</i> | Term upstream of SA1649, riboswitch ?                                                       |
| 1887313 | 1887560 | + | Staphylococcus   |                                                                                             |
| 1899115 | 1899440 | - | <i>S. aureus</i> |                                                                                             |
| 1899478 | 1899762 | - | <i>S. aureus</i> | HMM, Term                                                                                   |
| 1901329 | 1901482 | - | <i>S. aureus</i> |                                                                                             |
| 1901976 | 1902324 | - | Staphylococcus   |                                                                                             |
| 1907967 | 1908121 | - | Staphylococcus   | Upstream of STAR, HMM                                                                       |
| 1914230 | 1914658 | + | Staphylococcus   | RsaX16                                                                                      |
| 1916129 | 1916289 | + | <i>S. aureus</i> | 3' UTR of <i>tnp</i> and upstream of tRNA cluster                                           |
| 1921856 | 1922066 | - | Staphylococcus   | Upstream of rRNA                                                                            |
| 1923904 | 1924623 | - | Staphylococcus   | Upstream of rRNA                                                                            |
| 1929336 | 1929486 | + | Staphylococcus   |                                                                                             |
| 1931363 | 1931530 | - | <i>S. aureus</i> |                                                                                             |
| 1938347 | 1938528 | - | <i>S. aureus</i> |                                                                                             |
| 1939381 | 1939606 | - | <i>S. aureus</i> |                                                                                             |
| 1941930 | 1942087 | + | <i>S. aureus</i> |                                                                                             |
| 1944228 | 1944386 | + | Staphylococcus   |                                                                                             |
| 1945105 | 1945410 | + | <i>S. aureus</i> |                                                                                             |
| 1950480 | 1950858 | + | Staphylococcus   | STAR, HMM                                                                                   |
| 1951996 | 1952301 | + | Staphylococcus   | STAR, HMM, Livny et al. (5)                                                                 |
| 1952892 | 1953043 | - | <i>S. aureus</i> |                                                                                             |
| 1955115 | 1955395 | + | Staphylococcus   |                                                                                             |
| 1955903 | 1956286 | + | <i>S. aureus</i> |                                                                                             |
| 1961321 | 1962071 | - | Staphylococcus   | STAR, HMM, Livny et al. (5)                                                                 |
| 1965286 | 1965636 | + | Staphylococcus   |                                                                                             |
| 1975263 | 1975577 | + | <i>S. aureus</i> |                                                                                             |
| 1975655 | 1976120 | + | <i>S. aureus</i> |                                                                                             |
| 1977802 | 1978014 | + | <i>S. aureus</i> |                                                                                             |
| 1978693 | 1978946 | - | Staphylococcus   |                                                                                             |
| 1991902 | 1993014 | + | Staphylococcus   | HMM, RsaX17<br>Detection of a stable RNA in antisense, Roberts et al. (7), Livny et al. (5) |
| 2000792 | 2001169 | + | Staphylococcus   | HMM                                                                                         |
| 2002762 | 2003025 | + | <i>S. aureus</i> |                                                                                             |
| 2004766 | 2004935 | - | <i>S. aureus</i> |                                                                                             |
| 2005435 | 2006027 | - | <i>S. aureus</i> |                                                                                             |
| 2006124 | 2006498 | - | <i>S. aureus</i> |                                                                                             |
| 2006879 | 2007560 | + | <i>S. aureus</i> | sprD, Pichon and Felden (6)                                                                 |
| 2009578 | 2009756 | - | <i>S. aureus</i> |                                                                                             |
| 2010950 | 2011172 | - | Staphylococcus   | sprG, antisense to sprF, Pichon and Felden (6) ; Roberts et al. (7), C-rich motif           |
| 2012392 | 2012550 | - | <i>S. aureus</i> |                                                                                             |

|         |         |   |                  |                                             |
|---------|---------|---|------------------|---------------------------------------------|
| 2023371 | 2023533 | - | Staphylococcus   |                                             |
| 2044276 | 2044498 | + | <i>S. aureus</i> |                                             |
| 2044531 | 2044689 | + | <i>S. aureus</i> |                                             |
| 2046589 | 2046936 | + | <i>S. aureus</i> |                                             |
| 2050407 | 2050637 | + | <i>S. aureus</i> |                                             |
| 2052735 | 2053160 | + | <i>S. aureus</i> |                                             |
| 2054442 | 2054834 | + | Staphylococcus   | STAR, HMM                                   |
| 2056712 | 2056982 | + | <i>S. aureus</i> |                                             |
| 2057885 | 2058037 | + | <i>S. aureus</i> |                                             |
| 2058852 | 2059635 | + | <i>S. aureus</i> |                                             |
| 2060672 | 2061075 | + | Staphylococcus   |                                             |
| 2066059 | 2066357 | - | <i>S. aureus</i> |                                             |
| 2074274 | 2074451 | + | Firmicutes       |                                             |
| 2076511 | 2076703 | + | <i>S. aureus</i> |                                             |
| 2077355 | 2077666 | + | Staphylococcus   | STAR and Term upstream of SA1841            |
| 2078721 | 2078937 | + | Staphylococcus   | RNAIII-C-rich motif                         |
| 2079188 | 2079445 | + | Staphylococcus   | RNAIII-C-rich motif                         |
| 2082286 | 2082571 | + | <i>S. aureus</i> |                                             |
| 2086113 | 2086282 | - | <i>S. aureus</i> |                                             |
| 2089116 | 2089363 | - | <i>S. aureus</i> |                                             |
| 2090087 | 2090243 | + | Staphylococcus   |                                             |
| 2092236 | 2092595 | + | Staphylococcus   |                                             |
| 2097090 | 2097527 | + | Staphylococcus   | Term upstream of <i>ilvD</i> , riboswitch ? |
| 2112153 | 2112350 | - | Staphylococcus   | Upstream of rRNA                            |
| 2112351 | 2112621 | - | Staphylococcus   | Upstream of rRNA                            |
| 2114673 | 2115087 | - | <i>S. aureus</i> | Upstream of tRNA                            |
| 2117717 | 2118136 | - | <i>S. aureus</i> |                                             |
| 2120826 | 2121111 | - | <i>S. aureus</i> |                                             |
| 2125946 | 2126096 | - | <i>S. aureus</i> |                                             |
| 2140430 | 2140694 | + | <i>S. aureus</i> |                                             |
| 2142896 | 2143098 | + | <i>S. aureus</i> |                                             |
| 2145816 | 2145986 | + | Staphylococcus   |                                             |
| 2150134 | 2150353 | - | <i>S. aureus</i> | THI riboswitch upstream of <i>tenA</i>      |
| 2151848 | 2152017 | + | <i>S. aureus</i> |                                             |
| 2154589 | 2154831 | - | Staphylococcus   |                                             |
| 2170438 | 2170674 | - | Firmicutes       | Leader of <i>rpmE</i>                       |
| 2172033 | 2172272 | - | Staphylococcus   |                                             |
| 2173713 | 2173918 | - | <i>S. aureus</i> |                                             |
| 2175623 | 2175838 | - | <i>S. aureus</i> |                                             |
| 2176973 | 2177125 | + | Staphylococcus   |                                             |
| 2179408 | 2179559 | - | <i>S. aureus</i> |                                             |
| 2183309 | 2183669 | - | <i>S. aureus</i> |                                             |
| 2186103 | 2186358 | + | Staphylococcus   |                                             |
| 2191191 | 2191375 | - | Staphylococcus   |                                             |
| 2193769 | 2194327 | - | <i>S. aureus</i> |                                             |
| 2195501 | 2195682 | - | <i>S. aureus</i> |                                             |
| 2198126 | 2198299 | + | Staphylococcus   |                                             |
| 2198782 | 2198996 | + | <i>S. aureus</i> | Livny et al. (5)                            |
| 2199743 | 2200192 | + | <i>S. aureus</i> | Cis-regulatory leader of <i>ermA</i>        |
| 2211959 | 2212517 | + | Staphylococcus   | Antisense to GlmS riboswitch                |
| 2217927 | 2218109 | + | <i>S. aureus</i> |                                             |
| 2228994 | 2229181 | - | Staphylococcus   |                                             |
| 2233852 | 2234049 | - | Staphylococcus   |                                             |
| 2234050 | 2234320 | - | Staphylococcus   | Upstream of rRNA                            |
| 2235891 | 2236330 | - | Staphylococcus   | Upstream of rRNA                            |

|         |         |   |                  |                                         |
|---------|---------|---|------------------|-----------------------------------------|
| 2241225 | 2241396 | - | <i>S. aureus</i> |                                         |
| 2244132 | 2244347 | - | Staphylococcus   |                                         |
| 2245730 | 2245955 | - | Staphylococcus   |                                         |
| 2256957 | 2257130 | - | Staphylococcus   |                                         |
| 2258694 | 2258999 | - | <i>S. aureus</i> |                                         |
| 2269141 | 2269392 | - | <i>S. aureus</i> |                                         |
| 2270166 | 2270385 | + | <i>S. aureus</i> |                                         |
| 2271593 | 2271847 | + | <i>S. aureus</i> |                                         |
| 2273257 | 2273473 | + | <i>S. aureus</i> |                                         |
| 2278693 | 2279037 | + | <i>S. aureus</i> |                                         |
| 2282469 | 2282662 | - | Staphylococcus   |                                         |
| 2283771 | 2283931 | - | <i>S. aureus</i> |                                         |
| 2285904 | 2286114 | - | <i>S. aureus</i> |                                         |
| 2287009 | 2287178 | - | <i>S. aureus</i> |                                         |
| 2288114 | 2288407 | + | <i>S. aureus</i> |                                         |
| 2290679 | 2290831 | - | Staphylococcus   | L13 leader upstream of <i>rplM</i>      |
| 2294193 | 2294358 | - | <i>S. aureus</i> | End of <i>rplQ</i> , Roberts et al. (7) |
| 2297295 | 2297786 | - | Firmicutes       | Cis-regulatory leader of <i>infA</i>    |
| 2315523 | 2315785 | + | Staphylococcus   | STAR, HMM                               |
| 2317119 | 2317270 | + | <i>S. aureus</i> |                                         |
| 2322654 | 2322811 | - | <i>S. aureus</i> |                                         |
| 2326152 | 2326412 | - | Staphylococcus   | STAR, HMM                               |
| 2326455 | 2326612 | - | Staphylococcus   | STAR, HMM                               |
| 2335098 | 2335370 | + | <i>S. aureus</i> |                                         |
| 2336178 | 2336334 | + | Staphylococcus   |                                         |
| 2338812 | 2339179 | - | <i>S. aureus</i> |                                         |
| 2342611 | 2342890 | + | Staphylococcus   |                                         |
| 2347937 | 2348096 | + | <i>S. aureus</i> |                                         |
| 2348445 | 2348807 | - | Staphylococcus   |                                         |
| 2351998 | 2352576 | + | Staphylococcus   |                                         |
| 2353589 | 2353825 | + | Staphylococcus   |                                         |
| 2356433 | 2356657 | + | <i>S. aureus</i> |                                         |
| 2357081 | 2357300 | + | Staphylococcus   |                                         |
| 2365373 | 2365625 | - | <i>S. aureus</i> |                                         |
| 2367831 | 2368208 | + | Staphylococcus   | RsaI, Marchais et al. (8)               |
| 2370043 | 2370414 | + | <i>S. aureus</i> |                                         |
| 2371369 | 2371738 | + | <i>S. aureus</i> |                                         |
| 2373129 | 2373403 | + | Staphylococcus   |                                         |
| 2375948 | 2376119 | + | Staphylococcus   |                                         |
| 2378340 | 2378664 | + | Staphylococcus   |                                         |
| 2384868 | 2385044 | - | <i>S. aureus</i> |                                         |
| 2389095 | 2389322 | + | <i>S. aureus</i> |                                         |
| 2389754 | 2389995 | + | <i>S. aureus</i> |                                         |
| 2390997 | 2391225 | + | Staphylococcus   |                                         |
| 2393252 | 2393404 | + | <i>S. aureus</i> |                                         |
| 2398087 | 2398249 | - | <i>S. aureus</i> |                                         |
| 2399072 | 2399253 | + | <i>S. aureus</i> |                                         |
| 2399983 | 2400209 | + | <i>S. aureus</i> |                                         |
| 2405538 | 2405697 | + | <i>S. aureus</i> |                                         |
| 2406372 | 2406582 | + | <i>S. aureus</i> |                                         |
| 2409885 | 2410108 | + | <i>S. aureus</i> |                                         |
| 2411321 | 2411574 | - | <i>S. aureus</i> |                                         |
| 2412971 | 2413192 | - | <i>S. aureus</i> |                                         |
| 2414829 | 2415053 | + | <i>S. aureus</i> |                                         |
| 2425527 | 2425678 | + | <i>S. aureus</i> |                                         |

|         |         |   |                  |                                                                 |
|---------|---------|---|------------------|-----------------------------------------------------------------|
| 2426297 | 2426582 | - | <i>S. aureus</i> |                                                                 |
| 2429796 | 2430015 | - | <i>S. aureus</i> |                                                                 |
| 2430501 | 2430698 | - | <i>S. aureus</i> |                                                                 |
| 2431985 | 2432135 | + | Staphylococcus   |                                                                 |
| 2435998 | 2436269 | + | <i>S. aureus</i> | RsaX18, stable RNA in antisense orientation, Roberts et al. (7) |
| 2437028 | 2437317 | + | Staphylococcus   | Downstream of RsaX18                                            |
| 2439937 | 2440194 | + | <i>S. aureus</i> |                                                                 |
| 2440561 | 2440869 | + | Staphylococcus   | HMM, repeats, RsaX19                                            |
| 2442167 | 2442330 | - | <i>S. aureus</i> |                                                                 |
| 2442698 | 2443032 | + | <i>S. aureus</i> |                                                                 |
| 2443583 | 2443744 | + | <i>S. aureus</i> |                                                                 |
| 2445484 | 2445745 | + | Staphylococcus   |                                                                 |
| 2447564 | 2447719 | + | <i>S. aureus</i> |                                                                 |
| 2456483 | 2456710 | - | <i>S. aureus</i> |                                                                 |
| 2461228 | 2461426 | - | <i>S. aureus</i> |                                                                 |
| 2461971 | 2462198 | - | <i>S. aureus</i> |                                                                 |
| 2463308 | 2463504 | - | <i>S. aureus</i> |                                                                 |
| 2466457 | 2466755 | - | <i>S. aureus</i> |                                                                 |
| 2467832 | 2468006 | + | <i>S. aureus</i> |                                                                 |
| 2473362 | 2473553 | - | Staphylococcus   | RsaX20                                                          |
| 2474277 | 2474452 | - | <i>S. aureus</i> |                                                                 |
| 2475454 | 2475778 | + | <i>S. aureus</i> |                                                                 |
| 2475795 | 2476058 | + | <i>S. aureus</i> |                                                                 |
| 2477641 | 2477908 | + | <i>S. aureus</i> |                                                                 |
| 2478860 | 2479149 | + | <i>S. aureus</i> |                                                                 |
| 2479216 | 2479421 | + | <i>S. aureus</i> |                                                                 |
| 2486709 | 2486881 | - | <i>S. aureus</i> | RsaJ                                                            |
| 2490706 | 2491116 | - | Staphylococcus   | STAR, HMM                                                       |
| 2497788 | 2498049 | + | Staphylococcus   |                                                                 |
| 2503698 | 2503855 | + | <i>S. aureus</i> |                                                                 |
| 2509313 | 2509478 | - | <i>S. aureus</i> |                                                                 |
| 2514267 | 2514440 | + | Staphylococcus   |                                                                 |
| 2516120 | 2516273 | + | <i>S. aureus</i> |                                                                 |
| 2519098 | 2519353 | - | <i>S. aureus</i> |                                                                 |
| 2525577 | 2525767 | + | <i>S. aureus</i> |                                                                 |
| 2526558 | 2526857 | + | Staphylococcus   |                                                                 |
| 2536141 | 2536452 | - | <i>S. aureus</i> |                                                                 |
| 2536625 | 2536820 | - | <i>S. aureus</i> |                                                                 |
| 2544138 | 2544290 | - | Staphylococcus   |                                                                 |
| 2546465 | 2546691 | - | Staphylococcus   |                                                                 |
| 2549419 | 2549630 | - | <i>S. aureus</i> |                                                                 |
| 2551315 | 2551599 | - | <i>S. aureus</i> |                                                                 |
| 2556804 | 2557057 | + | <i>S. aureus</i> |                                                                 |
| 2557826 | 2558087 | + | <i>S. aureus</i> |                                                                 |
| 2562110 | 2562398 | - | <i>S. aureus</i> | HMM                                                             |
| 2563833 | 2564100 | - | <i>S. aureus</i> |                                                                 |
| 2564499 | 2564800 | + | <i>S. aureus</i> |                                                                 |
| 2568115 | 2568322 | - | <i>S. aureus</i> |                                                                 |
| 2571236 | 2571482 | - | <i>S. aureus</i> |                                                                 |
| 2571601 | 2571886 | - | <i>S. aureus</i> |                                                                 |
| 2575158 | 2575471 | - | <i>S. aureus</i> |                                                                 |
| 2580982 | 2581163 | - | <i>S. aureus</i> |                                                                 |
| 2583795 | 2583980 | - | <i>S. aureus</i> |                                                                 |
| 2585432 | 2585672 | + | <i>S. aureus</i> |                                                                 |
| 2586700 | 2586952 | + | <i>S. aureus</i> | RsaX22                                                          |

|         |         |   |                  |                                            |
|---------|---------|---|------------------|--------------------------------------------|
| 2590828 | 2591139 | + | Staphylococcus   | RsaX23, sprA3, Pichon and Felden (6), HMM  |
| 2596738 | 2596915 | + | <i>S. aureus</i> |                                            |
| 2599037 | 2599326 | + | <i>S. aureus</i> |                                            |
| 2600725 | 2600877 | + | <i>S. aureus</i> |                                            |
| 2601516 | 2601689 | + | <i>S. aureus</i> | Livny et al. (5)                           |
| 2605324 | 2605790 | + | <i>S. aureus</i> |                                            |
| 2609352 | 2609550 | - | <i>S. aureus</i> |                                            |
| 2611619 | 2611889 | - | <i>S. aureus</i> | RAT motif in leader of <i>ptsG</i>         |
| 2614788 | 2614993 | - | Staphylococcus   |                                            |
| 2616463 | 2616619 | + | Staphylococcus   |                                            |
| 2618504 | 2618750 | + | <i>S. aureus</i> |                                            |
| 2619921 | 2620083 | + | Staphylococcus   |                                            |
| 2620690 | 2621010 | + | <i>S. aureus</i> |                                            |
| 2629104 | 2629317 | + | <i>S. aureus</i> |                                            |
| 2635052 | 2635382 | + | Staphylococcus   | Includes part of repeats, Livny et al. (5) |
| 2644680 | 2644981 | - | <i>S. aureus</i> |                                            |
| 2646952 | 2647361 | - | <i>S. aureus</i> |                                            |
| 2647851 | 2648018 | - | <i>S. aureus</i> |                                            |
| 2648968 | 2649154 | - | <i>S. aureus</i> |                                            |
| 2649183 | 2649430 | - | <i>S. aureus</i> | RsaX24                                     |
| 2650531 | 2650761 | + | <i>S. aureus</i> |                                            |
| 2651470 | 2651647 | + | Staphylococcus   |                                            |
| 2651696 | 2651846 | + | <i>S. aureus</i> |                                            |
| 2652667 | 2652901 | + | Staphylococcus   | STAR, HMM                                  |
| 2661386 | 2661635 | - | <i>S. aureus</i> |                                            |
| 2663861 | 2664068 | + | <i>S. aureus</i> |                                            |
| 2666489 | 2666751 | + | <i>S. aureus</i> |                                            |
| 2671087 | 2671338 | - | Staphylococcus   | Livny et al. (5)                           |
| 2672085 | 2672534 | + | <i>S. aureus</i> | Cis-regulatory leader of <i>ermA</i>       |
| 2678310 | 2678645 | - | <i>S. aureus</i> |                                            |
| 2683676 | 2683834 | + | <i>S. aureus</i> |                                            |
| 2684016 | 2684324 | + | Staphylococcus   |                                            |
| 2687272 | 2687440 | + | Staphylococcus   |                                            |
| 2688908 | 2689084 | + | <i>S. aureus</i> |                                            |
| 2690843 | 2691222 | - | <i>S. aureus</i> |                                            |
| 2697740 | 2697970 | + | Staphylococcus   |                                            |
| 2698571 | 2698723 | + | Staphylococcus   |                                            |
| 2700573 | 2700856 | - | <i>S. aureus</i> |                                            |
| 2708048 | 2708199 | - | <i>S. aureus</i> |                                            |
| 2708791 | 2709614 | - | <i>S. aureus</i> |                                            |
| 2716436 | 2716702 | + | Staphylococcus   |                                            |
| 2721001 | 2721275 | - | <i>S. aureus</i> |                                            |
| 2726839 | 2727174 | - | <i>S. aureus</i> |                                            |
| 2727805 | 2727992 | - | <i>S. aureus</i> |                                            |
| 2729572 | 2729953 | - | <i>S. aureus</i> |                                            |
| 2730482 | 2730708 | + | <i>S. aureus</i> |                                            |
| 2731227 | 2731379 | + | <i>S. aureus</i> |                                            |
| 2739394 | 2739588 | + | Staphylococcus   |                                            |
| 2762069 | 2762602 | - | <i>S. aureus</i> |                                            |
| 2763342 | 2763605 | + | <i>S. aureus</i> |                                            |
| 2766556 | 2766758 | - | <i>S. aureus</i> |                                            |
| 2768925 | 2769664 | - | <i>S. aureus</i> | In antisense orientation to RsaX25         |
| 2773960 | 2774226 | + | Staphylococcus   | STAR                                       |
| 2776631 | 2777268 | - | <i>S. aureus</i> |                                            |
| 2784309 | 2784518 | - | <i>S. aureus</i> |                                            |



|         |         |   |                  |                       |
|---------|---------|---|------------------|-----------------------|
| 2792452 | 2792677 | + | <i>S. aureus</i> |                       |
| 2795645 | 2795809 | + | <i>S. aureus</i> |                       |
| 2796286 | 2796475 | + | <i>S. aureus</i> |                       |
| 2798095 | 2798255 | + | <i>S. aureus</i> |                       |
| 2800056 | 2800210 | + | <i>S. aureus</i> |                       |
| 2806131 | 2806408 | + | Staphylococcus   | Leader of <i>cspB</i> |
| 2808484 | 2808774 | - | Staphylococcus   |                       |
| 2814540 | 2814811 | - | Firmicutes       | Leader of <i>rpmH</i> |

The boundaries of the conserved regions and their locations on the DNA strand are given. Comments include the known regulatory regions as defined by RFAM, the Rsa RNAs, the IGRs which have been predicted (5), and stable RNAs which were previously identified (6-8). Interesting features of conserved regions are mentioned. Term is for terminator of transcription.

**Table S2.** List of predicted IGRs found by a Hidden Markov Model (HMM).

| HMM | Start-End       | Flanking genes             | Comments                                      |
|-----|-----------------|----------------------------|-----------------------------------------------|
| 1   | 24159-24341     | <i>purA/vicR</i>           | tRNA                                          |
| 2   | 39699-40058     | <i>Pre-bleO</i>            | RNAsim                                        |
| 3   | 42881-43180     | SA0035-SA0036              | RsaX01, RNAsim                                |
| 4   | 233122-233343   | SA0197- <i>oppF</i>        |                                               |
| 5   | 254692-254833   | <i>uhpT</i> -SA0215        | RsaG                                          |
| 6   | 311527-311657   | <i>bglA</i> - SA0257       | RNAsim                                        |
| 7   | 387896-388065   | SA0329- <i>appF</i>        | RNAsim                                        |
| 8   | 407757-407873   | SA0347-SA0348              | T-Box, RNAsim, Marchais et al. (8)            |
| 9   | 469644-469972   | SA0410- <i>ndhF</i>        | Long IGR with small ORF                       |
| 10  | 496930-497008   | <i>gltD-treP</i>           | tRNA                                          |
| 11  | 501419-501690   | SA0434-SA0435              | SRP                                           |
| 12  | 506179-507975   | <i>recR</i> -rRNA          | rRNA                                          |
| 13  | 508203-511102   | rRNA-rRNA                  | rRNA                                          |
| 14  | 511185-511878   | rRNA-SA0439                | 5S rRNA                                       |
| 15  | 549617-550468   | <i>lysS</i> -16S rRNA      | tRNA                                          |
| 16  | 550607-552312   | tRNA-23S rRNA              | rRNA                                          |
| 17  | 555476-555860   | 23S rRNA-SA0476            | rRNA                                          |
| 18  | 651668-651853   | SA0557-SA0558              | RNAsim, Livny et al. (5)                      |
| 19  | 659030-659146   | <i>argS</i> - SA0565       |                                               |
| 20  | 777116-777256   | SA0680- SA0681             | RNAsim, Livny et al. (5)                      |
| 21  | 777392-777519   | SA0680- SA0681             | RNAsim, Livny et al. (5)                      |
| 22  | 818082-818207   | <i>uvrA</i> - <i>hprK</i>  | RNAsim                                        |
| 23  | 830889-831241   | SA0725- <i>gapR</i>        | RNAsim                                        |
| 24  | 843796-844174   | <i>ssrP</i> -SA0738        | tmRNA                                         |
| 25  | 873970-874214   | truncated-SA*-SA0768       | RNAsim                                        |
| 26  | 874300-874421   | truncated-SA*- SA0768      | RNAsim                                        |
| 27  | 875413-875457   | SAS023-SA0769              | RNAsim, SAM riboswitch                        |
| 28  | 924504-924632   | <i>gudB</i> *- <i>glpQ</i> | RNAsim                                        |
| 29  | 1002623-1002696 | SA0881*-SA0882             | tRNA                                          |
| 30  | 1040000-1040140 | SA0914- <i>folD</i>        | RNAsim                                        |
| 31  | 1056349-1056701 | SA0929-SAS030              | Repeats downstream of a TPP riboswitch        |
| 32  | 1137073-1137371 | SA1004-SAS035              | RNAsim, Livny et al. (5)                      |
| 33  | 1142669-1142793 | SA1008-SA1009              | RNAsim                                        |
| 34  | 1152072-1152271 | SA1016-SA1018              | tRNA                                          |
| 35  | 1175550-1175624 | SA1037- <i>lsp</i>         | RNAsim, RsaX11                                |
| 36  | 1348702-1348948 | <i>opuD</i> - <i>citB</i>  | RNAsim                                        |
| 37  | 1353221-1351302 | SA1186-SA1187              | STAR                                          |
| 38  | 1395440-1395567 | SA1221-truncated SA        | RNAsim                                        |
| 39  | 1399134-1399210 | SA1224- <i>lysC</i>        | RsaX12, RNAsim, upstream of Lysine riboswitch |
| 40  | 1437057-1437239 | SA1265-SA1266              | RNAsim, Livny et al. (5)                      |
| 41  | 1483795-1483974 | SA1277-SA1279              | RNase P, RNAsim                               |
| 42  | 1523747-1523924 | SA1316-SA1317              | FMN riboswitch, RNAsim                        |
| 43  | 1618576-1618787 | <i>hemN-lepA</i>           | RNAsim                                        |
| 44  | 1633168-1633298 | SA1430- SA1431             | RNAsim, Livny et al. (5)                      |
| 45  | 1649265-1649307 | <i>alaS</i> - SA1447       | T-Box                                         |
| 46  | 1652906-1653242 | SA1448- SA1449             | Livny et al. (5)                              |
| 47  | 1660504-1660682 | SA1455- <i>aspS</i>        | 6S RNA                                        |
| 48  | 1663953-1664007 | <i>hisS</i> - <i>lytH</i>  | RNAsim, Livny et al. (5)                      |
| 49  | 1716110-1716151 | <i>thrS</i> - <i>dnal</i>  | RNAsim                                        |
| 50  | 1745253-1745539 | SA1526- SA1527             | RNAsim                                        |
| 51  | 1804057-1804207 | SA1572- SA1573             | RNAsim                                        |
| 52  | 1828454-1828572 | <i>ribD</i> - SA1590       | FMN riboswitch, RNAsim                        |
| 53  | 1839422-1839492 | SA1602- truncated-SA       | RsaX15, RNAsim                                |
| 54  | 1856483-1856685 | truncated-SA- <i>tnp</i>   | <i>sprA</i> , Pichon and Felden (6), RNAsim   |
| 55  | 1881838-1882594 | <i>seo</i> -SA1649         | tRNA                                          |
| 56  | 1899470-1899757 | SA1662-SA1663              | Long IGR + Term, RNAsim                       |
| 57  | 1907748-1907903 | SA1670- SAS053             | RNAsim                                        |

|    |                 |                       |                                                    |
|----|-----------------|-----------------------|----------------------------------------------------|
| 58 | 1916292-1918962 | <u>tnp-23S</u>        | rRNA                                               |
| 59 | 1918961-1921962 | <u>tRNA- tRNA</u>     | tRNA                                               |
| 60 | 1923883-1925438 | <u>23S- SA1678</u>    | rRNA                                               |
| 61 | 1950616-1950792 | <u>map- SA1705</u>    | Leader of <i>map</i> , Marchais et al. (8), RNAsim |
| 62 | 1952064-1952292 | <u>SA1705- SA1706</u> | RNAsim, Livny et al. (5)                           |
| 63 | 1961413-1961597 | <u>SA1714- SA1715</u> | RNAsim, Livny et al. (5)                           |
| 64 | 1992295-1992365 | <u>SA1738- SAS056</u> | RsaX17, RNAsim                                     |
| 65 | 2001219-2001316 | <u>SAS057- SA1749</u> | RNAsim                                             |
| 66 | 2011128-2011190 | <u>SA1760-sep</u>     | downstream of <i>sprG</i> , Pichon and Felden (6)  |
| 67 | 2054610-2054739 | <u>SA1814- SA1815</u> | RNAsim                                             |
| 68 | 2094306-2094381 | <u>SA1853- SA1854</u> |                                                    |
| 69 | 2108489-2109159 | <u>ilvA-23S</u>       | rRNA                                               |
| 70 | 2109258-2112139 | <u>5S-16S</u>         | rRNA                                               |
| 71 | 2112585-2114171 | <u>23S-2tRNA</u>      | rRNA-tRNA                                          |
| 72 | 2114295-2114494 | <u>16S- SA1867</u>    | rRNA                                               |
| 73 | 2145394-2145685 | <u>SA1892- SA1893</u> | Long IGR + Term                                    |
| 74 | 2212146-2212213 | <u>glmS- mtIF</u>     | glmS riboswitch                                    |
| 75 | 2230198-2230858 | <u>Arg-5S</u>         | rRNA                                               |
| 76 | 2230957-2232838 | <u>5S-16S</u>         | rRNA                                               |
| 77 | 2234884-2237870 | <u>23S- SA1969</u>    | rRNA                                               |
| 78 | 2282200-2282274 | <u>alsS- SA2010</u>   | long IGR                                           |
| 79 | 2315574-2315703 | <u>SA2053- SA2054</u> | RNAsim                                             |
| 80 | 2326436-2326506 | <u>SA2062- moaA</u>   | RNAsim                                             |
| 81 | 2440668-2440861 | <u>SA2171- gltT</u>   | RNAsim, RsaX19                                     |
| 82 | 2490989-2491119 | <u>SA2217- SA2219</u> | RNAsim                                             |
| 83 | 2491406-2491543 | <u>SA2217- SA2219</u> | RNAsim, <i>sprA2</i> , Pichon and Felden (6)       |
| 84 | 2513401-2513603 | <u>opuCA- SA2238</u>  | long IGR + Term                                    |
| 85 | 2544500-2544573 | <u>SA2267- SA2268</u> | Upstream of RsaX28                                 |
| 86 | 2560653-2560793 | <u>SA2283-SA2285</u>  | Long IGR                                           |
| 87 | 2561037-2561177 | <u>SA2283-SA2285</u>  |                                                    |
| 88 | 2561421-2561521 | <u>SA2283-SA2285</u>  |                                                    |
| 89 | 2561805-2561945 | <u>SA2283-SA2285</u>  |                                                    |
| 90 | 2562189-2562329 | <u>SA2283-SA2285</u>  | Long IGR, RNAsim                                   |
| 91 | 2590865-2590957 | <u>Fbp-SA2305</u>     | <i>sprA3</i> , Pichon and Felden (6), RNAsim       |
| 92 | 2652623-2652866 | <u>SA2360SA2361</u>   | RNAsim                                             |
| 93 | 2769241-2769328 | <u>SA2457-icaR</u>    | RsaX25                                             |

This analysis exploits the composition bias between known RNAs (tRNAs, rRNAs, tmRNA) and the rest of the genome. Known RNAs (underlined in violin), annotated in RFAM database, include stable and universally conserved bacterial RNAs (rRNAs, tRNAs, SRP, 6S RNA, tmRNA, RNase P) and several *cis*-acting leader of mRNAs regulated by metabolites (riboswitches: TPP, thiamine pyrophosphate; SAM, S-adenosyl methionine, FMN, flavin mononucleotide; Gln6P, glucosamine 6-phosphate). STAR and sequence repeats are underlined in orange. This HMM analysis predicts 28 new ncRNAs (no color). Other comments include the Rsa RNAs studied in this work, the IGRs which were predicted by RNAsim, and previously identified or predicted ncRNAs.

**Table S3.** Genes showing differential expression between RN6390 and  $\Delta$ *rsaE* mutant strains analyzed by microarray.

| Gene name                          | Function                                                 | Fold change | COG category |
|------------------------------------|----------------------------------------------------------|-------------|--------------|
| <b>Genes upregulated by RsaE</b>   |                                                          |             |              |
| <i>arcA</i>                        | Arginine deiminase                                       | 3,87        | E            |
| <i>arcB</i>                        | Ornithine carbamoyltransferase                           | 2,02        | E            |
| <i>arcC</i>                        | Carbamate kinase                                         | 2,08        | E            |
| <i>arcD</i>                        | Arginine/ornithine antiporter                            | 2,51        | E            |
| <i>arcR</i>                        | Transcriptional regulator, Crp/Fnr family                | 1,96        |              |
| <i>atl</i>                         | Bifunctional autolysin precursor                         | 2,63        | MG           |
| <i>beta</i>                        | Choline dehydrogenase                                    | 6,14        | E            |
| <i>betB</i>                        | Betaine aldehyde dehydrogenase                           | 33,97       | C            |
| <i>carB</i>                        | Carbamoyl phosphate synthase large subunit               | 1,95        | E            |
| <i>comK</i>                        | Competence transcription factor                          | 3,76        |              |
| <i>cudT</i>                        | Osmoprotectant transporter, BCCT family                  | 8,14        | M            |
| <i>fdh</i>                         | Formate dehydrogenase                                    | 2,01        | C            |
| <i>fmtA</i>                        | Autolysis and methicillin resistant-related protein      | 2,29        | V            |
| <i>fnbA</i>                        | Fibronectin-binding protein precursor                    | 1,88        | M            |
| <i>glpQ</i>                        | Glycerophosphoryl diester phosphodiesterase              | 1,92        | M            |
| <i>hlgC</i>                        | Gamma-hemolysin component C                              | 2,19        | V            |
| <i>isdC</i>                        | Iron transport associated domain protein                 | 1,92        | M            |
| SAOUHSC_02608                      | LysR family regulatory protein                           | 1,8         | K            |
| <i>Plc</i>                         | 1-phosphatidylinositol phosphodiesterase                 | 2,17        | I            |
| <i>pnbA</i>                        | Para-nitrobenzyl esterase                                | 1,85        | I            |
| <i>purK</i>                        | Phosphoribosylaminoimidazole carboxylase, ATPase subunit | 1,97        | F            |
| <i>pyrC</i>                        | Dihydroorotase                                           | 3,93        | F            |
| <i>pyrR</i>                        | Pyrimidine regulatory protein                            | 10,05       | F            |
| <i>ribB</i>                        | Riboflavin synthase subunit alpha                        | 2,77        | H            |
| <i>ribD</i>                        | Riboflavin biosynthesis protein                          | 3,67        | H            |
| <i>rnc</i>                         | Ribonuclease III                                         | 1,98        | K            |
| SA0423                             | Hypothetical protein                                     | 3,28        | S            |
| SA1598                             | Hypothetical protein                                     | 2,79        | S            |
| SA2309                             | Hypothetical protein                                     | 1,93        | S            |
| SAOUHSC_00025                      | Putative 5'-nucleotidase                                 | 2,16        | F            |
| SAOUHSC_00367                      | Putative sodium:dicarboxylate symporter protein          | 2,9         | R            |
| SAOUHSC_00484                      | MesJ/Ycf62 family protein                                | 1,83        | D            |
| SAOUHSC_00765                      | Putative comf operon protein 1                           | 2,40        | L            |
| SAOUHSC_01036                      | Hypothetical protein                                     | 2,57        | S            |
| SAOUHSC_02723                      | Putative glycerate kinase                                | 2,32        | S            |
| SAOUHSC_02770                      | Similar to diaminoepimerase                              | 3,15        | E            |
| SAOUHSC_02794                      | Hypothetical protein                                     | 2,40        | S            |
| SAOUHSC_02842                      | Hypothetical protein                                     | 2,63        | S            |
| SAOUHSC_02855                      | LysM domain protein                                      | 3,44        | R            |
| SAR1150                            | Antibacterial protein                                    | 2,92        | V            |
| SAOUHSC_02129                      | Hypothetical protein                                     | 2,17        | S            |
| SAV0884                            | Hypothetical protein                                     | 2,46        | S            |
| <i>ssaA</i>                        | Secretory antigen precursor SsaA                         | 5,66        | R            |
| <i>sspA</i>                        | Serine protease; V8 protease; glutamyl endopeptidase     | 2,65        | V            |
| <b>Genes downregulated by RsaE</b> |                                                          |             |              |
| <i>bioA</i>                        | Adenosylmethionine-8-amino-7-oxononanoate                | 0,33        | H            |
| <i>bioB</i>                        | Biotin synthase                                          | 0,18        | H            |
| <i>bioD</i>                        | Dethiobiotin synthase                                    | 0,18        | H            |
| <i>capI</i>                        | Capsular polysaccharide synthesis protein CapI           | 0,48        | M            |
| <i>capJ</i>                        | Capsular polysaccharide synthesis protein CapJ           | 0,46        | M            |
| <i>capL</i>                        | Capsular polysaccharide synthesis protein CapL           | 0,55        | M            |
| <i>capM</i>                        | Capsular polysaccharide synthesis protein CapM           | 0,51        | M            |
| <i>capN</i>                        | Capsular polysaccharide synthesis protein CapN           | 0,49        | M            |
| <i>capO</i>                        | Capsular polysaccharide synthesis protein CapO           | 0,53        | M            |
| <i>fadA</i>                        | Acyl-CoA acetyltransferase                               | 0,27        | I            |
| <i>fadB</i>                        | 3-hydroxyacyl-CoA dehydrogenase                          | 0,32        | I            |

|                  |                                                         |      |   |
|------------------|---------------------------------------------------------|------|---|
| <i>fadE</i>      | Acyl-CoA synthetase                                     | 0,46 | I |
| <i>ilvB</i>      | Acetolactate synthase small subunit                     | 0,19 | E |
| <i>ilvC</i>      | Ketol-acid reductoisomerase                             | 0,18 | E |
| <i>ilvD</i>      | Dihydro-acid dehydratase                                | 0,16 | E |
| <i>ilvN</i>      | Acetolactate synthase small subunit                     | 0,18 | E |
| <i>leuA</i>      | 2-isopropylmalate synthase                              | 0,36 | E |
| <i>leuB</i>      | 3-hydroxyacyl-CoA dehydrogenase                         | 0,3  | C |
| <i>lldp2</i>     | L-lactate permease                                      | 0,5  | C |
| SAS1649          | Putative soluble hydrogenase subunit                    | 0,34 | S |
| <i>oppA</i>      | Oligopeptide transport system ATP-binding protein OppA  | 0,39 | E |
| <i>oppB</i>      | Oligopeptide transport system ATP-binding protein OppB* | 0,48 | E |
| <i>oppC</i>      | Oligopeptide transport system ATP-binding protein OppC  | 0,43 | E |
| <i>oppD</i>      | Oligopeptide transport system ATP-binding protein OppD  | 0,48 | E |
| <i>oppF</i>      | Oligopeptide transport system ATP-binding protein OppF  | 0,45 | E |
| <i>pgk</i>       | Phosphoglycerate kinase                                 | 0,53 | G |
| <i>purF</i>      | Phosphoribosylpyrophosphate amidotransferase            | 0,54 | F |
| SACOL2620/SA2393 | 4-aminobutyrate aminotransferase*                       | 0,17 | F |
| SA0769           | ABC transporter ATP-binding protein                     | 0,41 | P |
| SA2491           | Hypothetical protein                                    | 0,55 | S |
| SACOL1020/SA0873 | Hypothetical protein*                                   | 0,45 | S |
| <i>Sak</i>       | Staphylokinase precursor                                | 0,53 | V |
| SAOUHSC_00401    | Hypothetical protein                                    | 0,43 | S |
| SAOUHSC_00949    | Sodium:alanine symporter family protein                 | 0,51 | E |
| SAOUHSC_01138    | Acetyltransferase (GNAT) family protein                 | 0,51 |   |
| SAOUHSC_01319    | Aspartate kinase                                        | 0,35 | E |
| SAOUHSC_02713    | 8-amino-7-oxononanoate synthase                         | 0,2  | H |
| SAOUHSC_03019    | ABC transporter ATP-binding protein                     | 0,55 | P |
| SAOUHSC_03020    | Similar to integral membrane protein                    | 0,49 | S |
| SAOUHSC_00842    | ABC transporter ATP-binding protein                     | 0,42 | P |
| <i>sucC</i>      | Succinyl-CoA synthetase subunit alpha*                  | 0,62 | G |
| <i>sucD</i>      | Succinyl-CoA synthetase subunit beta*                   | 0,65 | G |
| <i>thrB</i>      | Homoserine kinase                                       | 0,42 | E |
| <i>thrC</i>      | Threonine synthase                                      | 0,23 | E |

| COG category | Number of genes | Functional groups                                  |
|--------------|-----------------|----------------------------------------------------|
| C            | 4               | Energy production and conversion                   |
| D            | 1               | Cell cycle, cell division, chromosome partitioning |
| E            | 21              | Amino acid transport and metabolism                |
| F            | 6               | Nucleotide transport and metabolism                |
| G            | 4               | Carbohydrate transport and metabolism              |
| H            | 6               | Coenzyme transport and metabolism                  |
| I            | 5               | Lipid transport and metabolism                     |
| K            | 2               | Transcription                                      |
| L            | 1               | Replication, recombination and repair              |
| M            | 12              | Cell wall/membrane/envelope biogenesis             |
| P            | 3               | Inorganic ion transport and metabolism             |
| R            | 3               | General function prediction only                   |
| S            | 14              | Function unknown                                   |
| V            | 3               | Defense mechanisms                                 |

(Top) Fold change corresponds to RN6390 versus  $\Delta$ *rsaE* mutant data: values > 1 correspond to genes that are overexpressed in RN6390 strain whereas values < 1 correspond to genes that are overexpressed in the  $\Delta$ *rsaE* mutant strain. \*Predicted RsaE-mRNA base pairings.

(Bottom) The number of RsaE-dependent regulated genes corresponding to a defined group of function (COG) is given. The complete microarray data set has been posted on the Gene Expression Omnibus database (<http://www.ncbi.nlm.nih.gov/geo/>) under accession number GPL7137 for the platform design and GSE17135 for the original data set.

**Table S4.** List of oligonucleotides.

| <b>PCR intergenic regions, northern blot<sup>1</sup></b> |                                                          |                                   |                                                  |
|----------------------------------------------------------|----------------------------------------------------------|-----------------------------------|--------------------------------------------------|
| rsaX01f                                                  | CATGCTTGCCTAGGGGTATG                                     | rsaX01r                           | ATGTCCCAAGCTCCATTTTG                             |
| rsaX02f                                                  | TTTTTCATCATTTACGATACATCATT                               | rsaX02r                           | GCCAAGTTACATTGCTTAATCTCC                         |
| rsaX03f                                                  | TGATCACGATGAAGTCATTCAA                                   | rsaX03r                           | GGTGCAAATTAATAATACATCAGG                         |
| rsaX04f                                                  | GAAAAATCGTGTGATTATCTGAGC                                 | rsaX04r                           | TCAGTCAACTACTGCCAATATAACAT                       |
| rsaKf                                                    | TTGGTAACCATCACAGCTTAATTT                                 | rsaKr                             | TTGAAAACGCATACTTCACCA                            |
| rsaX05f                                                  | GGTCTCGTCTAGGCAAAGCA                                     | rsaX05r                           | AGACACTGCATCACGGTACG                             |
| rsaAf                                                    | CCATTACAAAAATTGTATAGAGTAGC                               | rsaAr                             | ACCCGAGTAGTCTTCCTTGG                             |
| rsaX06f                                                  | CGCTGTGAAGTTAGATAGATGAGTTT                               | rsaX06r                           | GCAGTTGCTGCACAAACAAA                             |
| rsaX07f                                                  | AGGCAATGTGAAAAAGCTGA                                     | rsaX07r                           | AGGAAGATAGCCGCATAACG                             |
| rsaCf                                                    | CATCGGATGAGTGTGGCTTA                                     | rsaCr                             | ACGCCATTCCCTACACACTC                             |
| rsaDf                                                    | CTTGGCTTTTATGGGAAATGA                                    | rsaDr                             | TCTGCTATAATGTTTTAACTTCTTCA                       |
| rsaX08f                                                  | ACGAAAGAAATGGGTTGCTC                                     | rsaX08r                           | TTCTAGCTGAAACCCTCTATAAAAA                        |
| rsaHf                                                    | TCATTATTGTTGTTCAAAGGTTATACA                              | rsaHr                             | ACGATTAACGTACGGGTCCA                             |
| rsaX09f                                                  | TGATCGTGATAGCGGATACATTT                                  | rsaX09r                           | GCTTTTATGTTATATTTTCAAGCAAGA                      |
| rsaEf                                                    | CCCCTTTGTTTGAAGTGAAAA                                    | rsaEr                             | AATCGTTAATGTATAAAAAGTGCAT                        |
| rsaE-RT                                                  | TTTTCACTTCAAACAAAGGGG                                    | rsaE-Cmotif                       | AAAGGGGATGGGAGAAA                                |
| rsaX10f                                                  | TCTAGAAATCTTTTTCAATTATATG                                | rsaX10r                           | TTCCATGTTGTCAAACCCTTT                            |
| rsaX11f                                                  | GTATTAATGGCGAGACTCCTGA                                   | rsaX11r                           | CTTCGTATTGAATGGCTTCG                             |
| rsaX12f                                                  | ATACTTCGTATTGAATGGCTTCG                                  | rsaX12r                           | GGACACGAGGCTGGGATATT                             |
| rsaX13f                                                  | GCTAAAAAGAAGAATCAACAAAAGC                                | rsaX13r                           | AAACAGTGGTCTTTTATCATTCTG                         |
| rsaX14f                                                  | AATCCTCAACCAATGCCTACA                                    | rsaX14r                           | CCATGAAAATGGGATAGCAA                             |
| rsaX15f                                                  | GGCTGGGACATAAATCCCTAA                                    | rsaX15r                           | AGACTCCTGAGGGAGCAGTG                             |
| rsaX16f                                                  | TTAACTTTAACAATGATTAGTTGGCTA                              | rsaX16r                           | CATGACATTGATTAGTGAGTAGATTG                       |
| rsaX17f                                                  | GAAGGGACCCAACACAGAAA                                     | rsaX17r                           | CTCAGCCTTGGTCTTCGACT                             |
| rsalf                                                    | CACGTGCTAGCCGACAAATA                                     | rsalr                             | TAACAGGGGGAGCGATTAAA                             |
| rsaX18f                                                  | AGTGCGATTTCAAGATGCTG                                     | rsaX18r                           | TCAAATCAACAACAATAACCATCA                         |
| rsaX19f                                                  | GCATGCATAAAAGCCCCTAA                                     | rsaX19r                           | GCCCCTTACAACCTTTGGT                              |
| rsaX20f                                                  | TTTCGAGTATCCCTAGCTCGTT                                   | rsaX20r                           | GCTGCATGTACACAAGGAGTG                            |
| rsaJf                                                    | GGGCAGATATAAACAGCGATTC                                   | rsaJr                             | GGGCAATAGTGAGGGGATTT                             |
| rsaX21f                                                  | TTCCAAATAAATAAAGGGATTTGTGA                               | rsaX21r                           | ATGCGTTCATTCATGCCATT                             |
| rsaX22f                                                  | GCTGAAAGTCACCTAAAATCCTTT                                 | rsaX22r                           | TGTGTGGAAGACAGGGTAAA                             |
| rsaX23f                                                  | TTGCGAGTAGTGAGGGGATT                                     | rsaX23r                           | TTAGTTGATTTTGCATTTTT                             |
| rsaX24f                                                  | CGCAATTA AAAAGCAATCAACA                                  | rsaX24r                           | AATGTTATTGTGAATTGCGAGAA                          |
| rsaX25f                                                  | TACCTTGCGTAACCCGTCAC                                     | rsaX25r                           | TGACAATACAAATCGATATTGAGAA                        |
|                                                          |                                                          |                                   |                                                  |
| rsaGf                                                    | GTGCGTGAAGAGATGAAAGATAC                                  | rsaGr                             | CTTCATAACAGGGAATTATG                             |
| rsaBf                                                    | GTGTTAATTGTAGCGCATCCC                                    | rsaBr                             | GGTTGCAATATTTAATTGGG                             |
| RT-RNAIII5                                               | AATACATAGCACTGAGTCCAAGG                                  | RT-RNAIII6                        | CCTAGATCACAGAGATGTGATGG                          |
| 6Sf                                                      | ATGGGTTTTCTTGACGCGTA                                     | 6Sr                               | CGTGTACGCTGCAAGAAAACCC                           |
| Anti-rsaA                                                | GTTAAAGTTCTCCCAAGGAAG                                    |                                   |                                                  |
| Anti-rsaC                                                | GGTTTCCTCCCCCATAGATC                                     |                                   |                                                  |
| Anti-rsaH                                                | TTGACTCCCTTTAGTAGTGG                                     |                                   |                                                  |
| Anti-rsaE                                                | ATTTCTCCCATCCCCTTTGT                                     |                                   |                                                  |
| Anti-rsaG                                                | GATACTGCTTCTACCCTTGC                                     |                                   |                                                  |
| 5SrRNAr                                                  | AACAGGTGTGACCTCCTTGC                                     |                                   |                                                  |
|                                                          |                                                          |                                   |                                                  |
| <b>In vitro transcription/toeprint</b>                   |                                                          |                                   |                                                  |
| rsaG-5'- <i>StuI</i>                                     | TATAGGCCTCTGCCCGACGGCATG<br>TGCG                         | rsaG-3'- <i>Bam</i> HI            | TATGGATCCACAATACTCCCTACAATA<br>TTG               |
| rsaA- <i>Bam</i> HI-T7                                   | AAAGGATCCTAATACGACTCACTATA<br>GGTTAACCATTACAAAAATTGTATAG | rsaA- <i>DraI</i> - <i>Eco</i> RI | TTGAATTCCTTTAAAGTACACTTTGCTC<br>ATAGCAAAGTGTACCC |
| rsaH-                                                    | AAAGGATCCTAATACGACTCACTATA                               | rsaH- <i>DraI</i> -               | TTGAATTCCTTTAAAACGACCCGCAC                       |

|                                   |                                                                          |                                              |                                          |
|-----------------------------------|--------------------------------------------------------------------------|----------------------------------------------|------------------------------------------|
| <i>Bam</i> HI-T7                  | GGTACCTTCGATAACGAATAAACATC<br>TC                                         | <i>Eco</i> RI                                | GATTAACGTACGGG                           |
| <i>rsaE</i> -<br><i>Bam</i> HI-T7 | AAAGGATCCTAATACGACTCACTATA<br>GGAAATTAATCACATAACAAACATAC<br>CCCTT        | <i>rsaE</i> - <i>Dra</i> I-<br><i>Eco</i> RI | TTGAATTCTTTAAAAAACGTCGTGTC<br>TGAATACACG |
| <i>oppB</i> -<br><i>Bam</i> HI-T7 | AAAGGATCCTAATACGACTCACTATA<br>GGAATGATTTTTTAATTTCTTCAGC                  | <i>oppB</i> -<br><i>Eco</i> RI               | AAAGAATTCTGCGTAGCTACAGGATC               |
| opptoe1                           | GGCGAACCTGGCATTAAATTC                                                    |                                              |                                          |
| sa0873-<br><i>Bam</i> HI-T7       | AAAAAAGGATCCGATCCCGGAAAT<br>TAATACGACTCACTATAGGTAAACA<br>AAGGAGGAATTCAGA | sa0873-<br><i>sac</i> I                      | AAAAAAGAGCTCAATTTCAAATGGCG<br>CTTTAATTGT |

**Deletion/replacement  $\Delta$ *rsaE*/*aphA*-3 mutant of *S. aureus* RN6390**

|                                   |                                     |
|-----------------------------------|-------------------------------------|
| <i>rsaE</i> -140- <i>sm</i> I     | TTTCCCGGGAGGT TTACTACATA TG         |
| <i>rsaE</i> -2041r- <i>Eco</i> RV | TAAGATATCG TTCATAATAT AACATGCTAT C  |
| <i>rsaE</i> -2163- <i>S</i> alI   | CGTGTGACACA TGTTCTTTTT TAATAAGAGA G |
| <i>rsaE</i> -3214r- <i>X</i> hoI  | TGACTCGAGA TGGCTGGAGA ATTAC         |
| <i>rsaE</i> -70-CT                | GTTCAGATAG AGGTAATGAC               |
| <i>rsaE</i> -3283r-CT             | GATTAAGTGC TAATCATATG GTG           |

<sup>1</sup>Oligonucleotides used for the PCR reactions: r is for reverse and f for forward; RT oligonucleotide used for primer extension.
